# Supplementary material
Source: Research Square preprint supplement (doi:10.21203/rs.3.rs-8614090/v1)
Supplement: Supplementary file 1 [file 57b5b61bf507fd7f8c3aa9bc.docx]

**Supplementary File-1**

**Supplementary Table 1**. Public ALS RNA-seq datasets used in this study.

| **GEO Series** | **PRJNA** | **Total samples** | **ALS (n)** | **Control (n)** | **Tissue region(s)** | **Reference** |
| --- | --- | --- | --- | --- | --- | --- |
| GSE124439 | PRJNA512012 | 176 | 148 | 28 | Multiple cortical tissue regions | Tam et al., Cell Reports (2019) |
| GSE201407 | PRJNA831563 | 24 | 12 | 12 | Primary motor cortex | Sommer et al., Front. Mol. Neurosci. (2022) |
| GSE277709 | PRJNA1163403 | 84 | 42 | 42 | Whole blood | **Kõks et al., (2025)** |


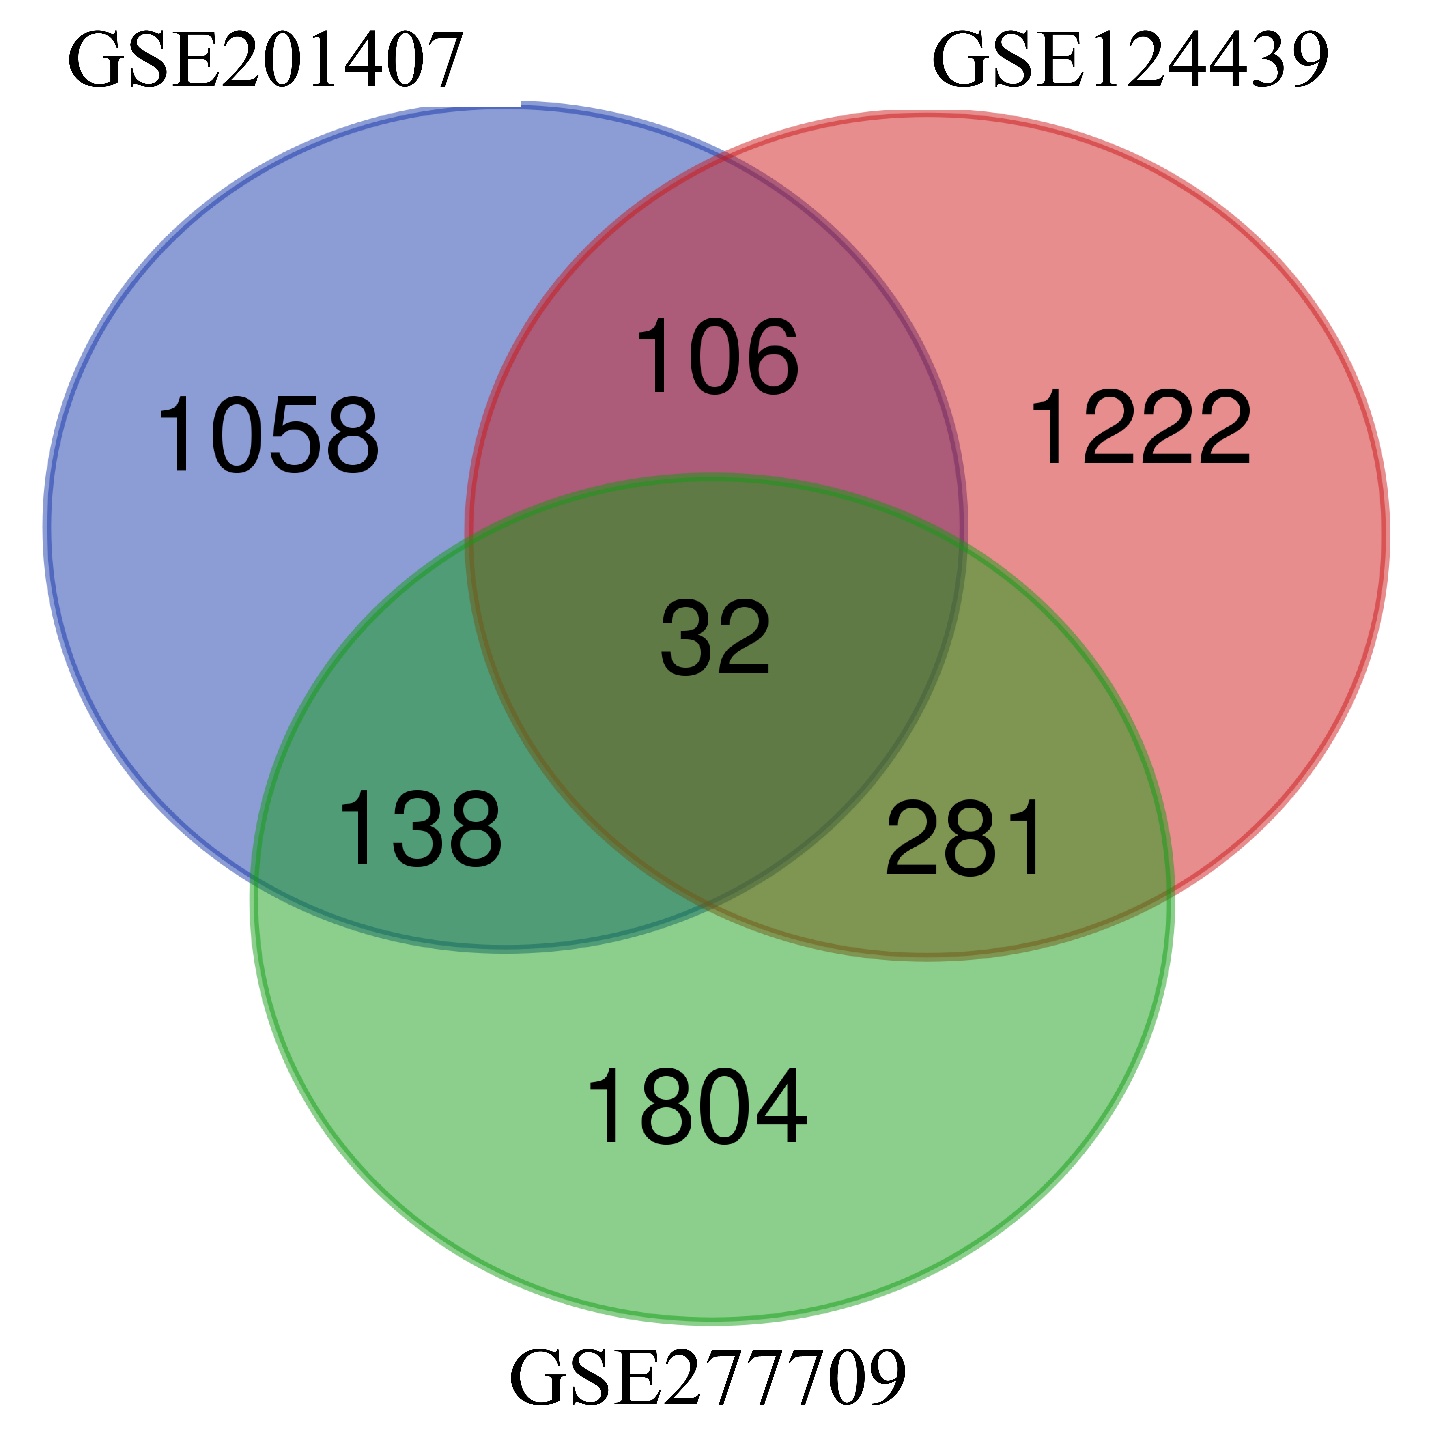


**Figure S1.** Venn diagram showing the overlap of differentially expressed genes (DEGs) identified across the three ALS RNA-seq datasets (GSE201407, GSE124439, and GSE277709). A total of 32 DEGs were consistently shared among all three datasets.


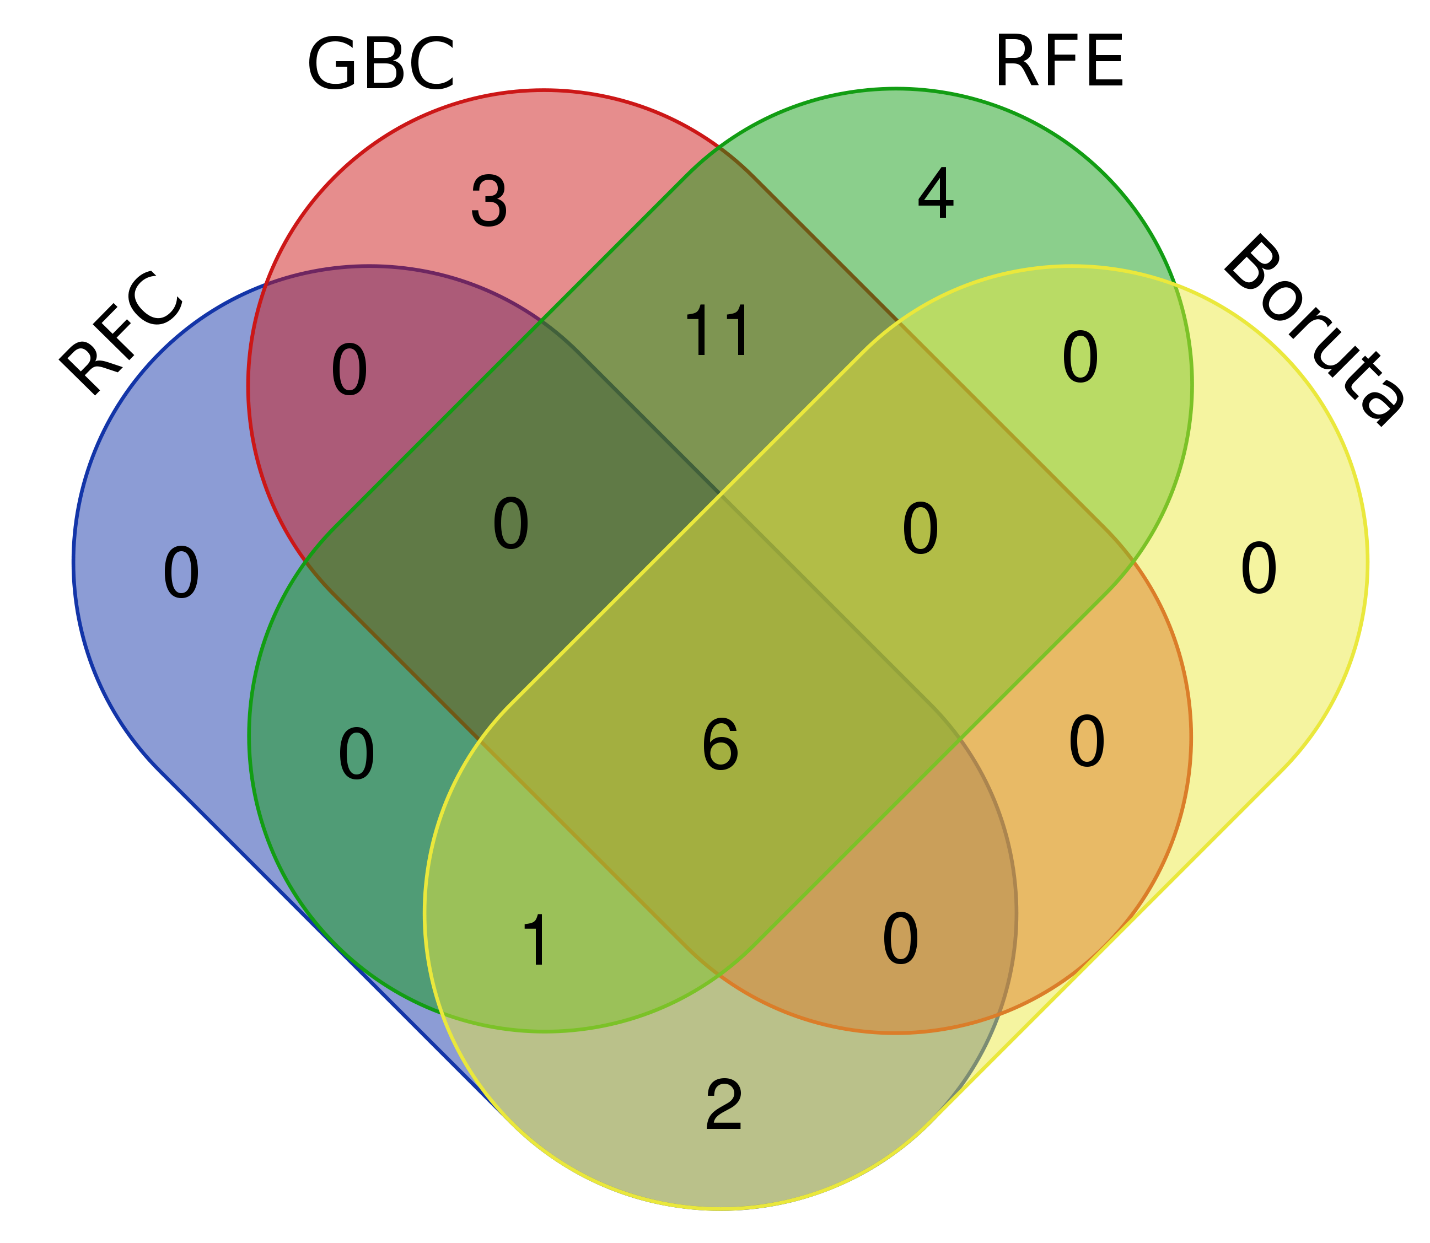


**Figure S2.** Venn diagram illustrating the overlap of gene features selected by four independent feature selection methods: Random Forest (RFC), Gradient Boosting Classifier (GBC), Recursive Feature Elimination (RFE), and Boruta, for ALS versus control classification. A total of six genes were consistently selected across methods.
