# Supplementary material
Source: Research Square preprint supplement (doi:10.21203/rs.3.rs-8614090/v1)
Supplement: Supplementary file 2 [file 859e0a9a50d7b00cfc81516b.xlsx]

## Sheet: final features
	Supplementary File-3:
HERC2P2	LOC107987008	KCNE4	COL6A4P2	ACTA1	ABCA4	Group
11.3679	6.11039	7.19735	5.34704	4.81839	5.68121	1
11.0964	4.76605	5.81081	5.02249	4.36708	5.31389	1
11.2985	5.49034	6.31588	5.20894	4.5928	5.16349	1
12.0012	5.51741	6.22297	4.51211	4.58624	4.8449	1
11.8774	4.72032	8.31414	4.7787	4.52662	5.63101	1
11.6642	6.17682	7.67721	5.13681	4.5928	4.4738	1
11.1778	5.50455	7.32474	5.2423	4.47803	5.47003	1
10.471	5.44451	5.31328	5.11581	4.22935	4.8186	1
11.2214	7.36726	6.29354	5.2769	4.85175	5.18269	0
10.472	6.87203	6.59866	5.34377	4.41268	4.98363	1
11.5589	4.89612	6.55778	5.24976	4.76818	5.21834	1
11.1703	6.16017	4.5312	5.17539	5.08789	5.29677	1
10.8498	5.67195	6.59923	4.82255	4.72751	5.81066	1
11.4661	6.21212	7.19825	5.53679	4.98117	5.22058	1
11.2114	3.92112	5.68167	4.72075	4.65466	5.15374	1
12.2248	5.02355	6.98501	5.59481	4.78362	5.85593	1
12.4917	5.82031	7.36465	4.87915	4.87915	5.78582	1
12.0804	4.41641	7.44238	4.50423	4.32138	4.21759	1
12.0846	6.016	7.3617	5.17509	4.88288	4.56553	1
11.1136	5.52529	6.13316	5.25537	4.63034	5.00027	1
10.4039	5.55618	6.25445	4.95194	4.75576	5.15397	1
11.2958	6.83424	7.01265	5.89558	6.36763	4.98722	0
11.6071	6.31698	6.99096	5.35702	4.93466	5.42136	1
11.2171	5.44453	6.53301	5.14468	4.57433	5.05796	1
10.6557	5.89973	6.74674	5.14891	4.15244	4.6506	1
11.4811	4.3592	6.40307	4.91594	4.27765	5.10184	1
11.8755	4.93908	7.90484	4.4852	3.85466	4.07665	1
11.1033	6.2297	7.78357	4.76357	4.23993	4.59288	1
11.6194	4.89883	7.22634	5.25537	4.00454	4.65317	1
11.2566	6.97289	6.27993	5.37821	4.68534	5.1102	0
11.2307	6.88391	7.66505	5.61623	4.56393	5.97232	1
10.7346	5.44904	5.99919	5.25117	4.68314	5.64872	1
11.4143	6.13061	6.43017	5.57066	4.23329	5.22407	1
10.6419	5.4216	4.5324	4.96284	5.13385	4.96284	1
10.8539	5.89697	6.93337	5.57853	4.32172	5.32955	1
10.501	6.82878	5.62933	4.73284	4.73284	5.22109	1
10.8542	6.54047	5.76329	5.24825	4.76523	5.28456	0
11.4191	6.15663	6.48276	4.36547	4.46991	5.41142	1
10.3869	5.94712	6.24506	4.94169	3.5992	5.04424	1
10.8974	5.383	5.383	4.58551	4.32093	4.58551	1
11.1687	6.09006	6.76283	5.8566	4.84588	5.29521	1
10.4319	6.03086	6.80228	5.22985	4.34215	4.60969	1
10.8527	5.80357	5.72543	5.06821	4.96674	4.93109	0
11.7605	6.26715	6.85068	4.52489	4.52489	5.31584	1
10.6092	5.91704	5.96882	4.93416	4.40176	4.96985	1
11.1303	5.67031	4.62347	4.94413	4.46772	5.33427	1
10.3525	6.43064	6.62805	5.29439	4.43839	4.53287	1
10.802	6.15519	5.87711	5.06375	4.33097	4.72275	0
11.9253	5.63925	8.34031	4.55432	4.40339	4.48126	1
10.6834	5.83615	5.94458	4.90531	4.02472	4.85973	1
11.4776	5.09826	7.72366	5.35265	3.85206	5.91579	1
11.5042	6.82003	8.77165	5.25766	4.39865	5.77515	1
11.8671	5.51631	6.11267	5.54465	3.92865	5.15819	0
9.733	5.29623	5.68305	5.05173	4.56912	5.29623	1
11.2206	5.78864	5.26028	5.37272	5.00246	5.00246	1
11.4959	5.73794	7.00102	5.82276	5.02898	5.58396	1
9.84854	5.54494	5.46464	4.70704	4.65709	5.04855	1
11.5682	5.83446	5.53814	5.50094	4.83127	5.64409	1
11.0655	4.44379	7.25239	5.07979	4.90097	4.69332	1
10.9377	6.733	6.93799	4.87661	4.45971	5.35468	1
12.2945	5.62442	6.12503	4.98312	3.87909	5.28469	0
9.82499	5.19658	5.00155	4.49174	4.66759	5.08304	1
10.8799	5.08568	6.19761	5.1909	3.98688	5.04866	1
10.9466	5.81137	5.51849	5.45594	4.19301	4.8791	1
11.2761	7.02888	6.606	4.51656	4.25315	5.18574	1
10.4638	5.70678	5.70678	5.02895	4.36318	4.80319	1
10.7394	4.5161	7.41678	4.92693	4.10107	4.44433	1
11.5228	5.78585	6.06743	5.29143	4.18245	4.49825	1
11.0215	5.73075	5.56712	4.75984	4.70558	4.5894	1
11.2925	5.40118	5.69889	4.84577	4.40368	5.01961	1
11.4732	5.50464	5.56374	4.99818	4.52446	4.99818	1
11.0702	6.90799	8.14834	4.80014	5.15327	5.33411	1
11.1402	6.95341	7.12656	4.91907	5.16016	4.31918	1
11.0807	7.09661	6.63636	5.02532	4.64053	5.3223	1
12.9561	4.35397	5.36069	6.05043	4.35397	5.74785	1
11.082	5.3974	6.57789	4.39644	3.81074	5.01899	1
11.2642	5.70865	6.35398	4.77098	5.02787	5.84319	1
11.3553	5.51288	6.32004	5.02515	4.23205	5.44282	1
10.4776	5.50624	5.05443	4.27525	4.91275	5.14107	1
10.2198	5.53081	5.0382	4.85599	4.64348	4.45599	1
10.9561	5.17514	4.45873	4.66373	4.29917	5.33466	1
11.2175	5.79666	6.69267	5.58359	3.99353	5.33154	1
11.6792	5.09218	7.94026	5.34614	3.41803	4.00162	1
10.4304	5.26362	6.75557	4.95028	4.3863	5.61357	1
11.7778	4.57331	9.91654	4.77102	3.77107	4.9419	1
11.6159	4.51186	6.69872	5.27632	4.41221	5.51706	1
9.4124	6.65559	5.51747	4.89862	4.30345	4.46338	1
9.17649	6.62646	5.64132	5.1894	4.55137	4.32302	1
9.04012	6.59097	5.43321	4.98523	4.5237	4.65599	1
11.4935	4.64106	6.9283	4.86831	4.19203	3.87089	1
10.6977	5.01334	7.226	4.69461	4.58651	4.01254	1
11.2266	4.5698	5.99236	4.76722	4.03413	4.24277	1
10.7225	3.94959	7.47763	6.44702	3.74811	4.11548	1
10.3268	4.04407	8.35975	5.94048	3.69531	3.82728	1
9.99687	5.49398	5.69489	5.49398	3.9879	4.6066	1
9.62105	6.29728	5.98966	5.63617	4.59843	5.2159	1
9.91209	5.68489	5.49727	5.33759	3.62526	5.39292	1
9.29602	6.45327	5.72	4.45542	4.77977	4.6601	1
10.9179	4.39203	6.14071	5.96533	4.49066	4.28415	1
10.9436	4.81028	7.03846	5.82983	4.22305	4.32718	1
10.4565	5.06561	6.3584	5.46976	4.29735	3.95439	1
10.3423	5.86423	5.37886	5.0729	4.33774	4.67358	1
10.509	5.43934	5.75849	4.92021	4.32006	4.55451	1
10.4754	5.76977	5.60354	4.86641	4.79657	4.99569	1
10.9184	5.57952	5.62355	4.89642	4.08061	4.89642	1
11.2428	5.04082	6.6636	5.17755	4.51405	4.96676	1
10.9388	5.21083	4.9566	4.88454	4.64015	5.42444	1
11.3033	5.07924	4.27042	5.38935	4.67289	4.8027	1
11.2593	5.0224	7.20599	4.58284	3.994	5.06814	1
11.6	6.20176	5.87787	5.76644	4.74525	5.69504	1
11.2502	5.58998	6.77312	4.22205	4.42138	5.10517	1
11.6094	4.62422	6.67223	4.23052	4.81056	5.57705	1
12.1158	4.87459	6.75973	4.82708	4.55823	5.60834	1
11.7418	4.97511	5.64305	4.40592	4.69133	4.75337	1
11.488	4.85365	5.9535	4.79745	4.79745	4.61205	1
11.5487	4.71491	5.35933	4.71491	4.76603	4.54755	1
11.0514	5.58292	7.12129	4.78235	4.58375	5.32513	1
10.4302	5.8816	7.19883	4.36652	4.65204	4.65204	1
10.7543	6.20974	6.26964	4.66091	4.61191	5.40642	1
11.684	5.30659	7.15065	4.8619	4.8619	5.53794	1
11.8891	6.481	6.30125	5.0107	4.77006	5.54657	1
11.8107	6.38175	6.74865	5.39531	4.31493	5.28013	1
10.5111	5.37225	5.52715	4.18401	4.37887	5.28767	1
10.3114	5.43732	5.53906	4.83939	4.38807	4.90846	1
10.3853	5.38314	6.49424	4.97003	4.79749	5.1695	1
9.77427	6.09752	4.64976	4.64976	5.15849	5.3173	0
10.578	4.45012	5.32827	5.15784	4.33895	5.83571	0
12.3999	4.69341	6.03973	5.50611	4.61579	5.54618	0
12.023	5.85657	6.52098	5.37287	4.43991	5.23208	1
11.0168	6.3935	6.63281	5.60657	4.72501	4.27991	1
11.1894	6.14757	7.71839	5.9779	4.61216	4.452	1
11.0515	5.6476	6.47261	4.70272	4.38859	5.0623	1
11.6588	5.58663	6.43774	4.88229	4.33274	5.26495	1
12.1785	4.35203	7.85691	4.43699	4.16003	4.66045	1
12.099	4.87091	7.36462	4.58878	5.42947	5.6934	1
10.8099	5.38144	6.10716	4.53829	4.79167	6.19172	1
10.71	6.00211	5.66515	5.28755	4.19806	4.90243	1
11.4001	5.27239	6.84603	5.04604	4.77245	5.23008	1
12.6531	6.52928	8.06154	6.3786	4.77579	6.97589	0
12.1133	6.07473	6.96319	5.07767	4.7018	5.01071	1
12.4674	6.3954	7.2885	4.8204	4.54365	5.28551	1
11.4983	4.97062	6.85389	4.82546	4.40238	5.52457	1
12.3831	5.60244	5.97248	4.78021	4.4558	5.81629	0
11.4306	3.70318	7.63318	4.19187	3.70318	6.81004	1
13.2334	5.23648	6.20636	6.12637	4.6565	6.28208	0
10.9731	5.86008	4.71894	4.78676	4.40264	5.40624	1
10.9933	5.26644	6.61875	4.99024	4.41791	5.04046	1
10.9372	5.68384	5.3685	5.00954	4.25679	5.55251	1
11.1974	5.42077	5.24232	4.55642	4.68002	5.48609	1
10.9427	6.69253	6.41243	5.86089	4.97601	5.74756	0
12.1995	6.29352	5.60189	6.21075	4.59242	5.57533	0
11.2796	5.56	5.4457	5.03052	4.60116	5.07048	1
11.7285	5.49264	6.11374	4.94311	4.7993	5.11305	0
12.08	4.78378	5.55071	5.28566	4.51098	5.8304	1
10.9501	5.46795	5.42703	5.46795	5.09976	5.62045	1
11.7554	5.77482	6.59651	4.65961	4.77926	5.50554	1
10.4357	5.47222	5.79358	5.00106	4.94866	6.33471	1
11.2459	4.90416	5.58883	4.59362	4.59362	6.18579	1
11.3892	5.55209	8.39264	5.18963	4.49577	5.21385	1
10.7365	5.43548	6.38078	4.73381	5.38244	5.32725	1
11.2275	5.17813	6.2769	4.30555	4.87861	4.96731	1
12.3394	4.87263	6.18354	4.09384	5.03866	6.11392	1
11.4871	5.41288	5.85292	4.55323	4.99168	6.30841	1
11.8059	5.09182	6.26204	4.85388	4.97875	6.16922	1
11.4818	5.24696	7.22244	5.84497	5.06164	5.70661	1
11.7454	5.42858	7.76877	5.73762	4.72612	5.7123	1
12.2647	5.9066	7.55542	5.97766	5.09624	5.51472	1
12.2987	5.81089	7.59648	6.46039	4.82281	5.73147	1
11.8408	5.14354	7.18539	4.97487	4.31605	5.45629	1
12.0437	5.28456	6.12499	4.8745	5.00635	5.79484	1
11.4205	5.65925	6.50653	5.47726	5.21384	5.43318	1
11.3359	5.61379	6.22817	5.59424	4.97494	5.18082	1
11.2786	5.79623	6.20733	5.49542	4.81871	5.82586	1
11.4418	5.68104	6.31311	5.48146	4.71535	5.61778	1
12.6657	4.8121	6.99212	5.53195	5.26119	5.05724	1
12.6642	4.90983	7.05422	5.49285	4.85905	5.00528	1
13.0787	4.67803	8.52408	6.34922	5.19809	4.87799	1
12.7292	5.16106	7.44179	6.13289	5.16106	5.43284	1
11.6859	5.89027	6.68672	5.31166	4.95396	5.38723	1
11.6399	5.90437	6.20223	5.24297	5.28148	5.99622	1
12.7755	4.40455	8.17102	4.68715	4.76678	5.35988	1
12.9491	4.16275	9.02483	4.98973	5.03718	6.13284	1
11.8763	5.05871	6.37639	5.17876	4.82768	4.66303	1
11.8774	4.83944	6.67791	5.07568	5.02084	5.4041	1
12.3164	6.46542	6.46542	5.85072	4.67866	5.66683	1
12.2853	6.34378	6.22506	5.79228	5.02159	5.40136	1
12.5166	4.93401	7.74216	4.0829	4.26136	4.53681	1
12.7153	4.88758	7.87289	4.70342	4.07313	4.4818	1
11.3389	5.28518	5.48698	5.43939	5.20052	8.86053	0
11.4436	5.24487	5.74171	5.55376	5.22139	6.04116	0
11.7883	5.66482	5.56762	5.51622	4.92844	5.08494	0
11.8419	5.99461	5.37162	5.96089	5.00582	5.07473	0
12.0091	5.37888	5.23192	6.22563	4.50484	6.22563	0
12.1132	5.13563	5.89432	6.26462	5.26607	6.17302	0
10.8624	6.09978	7.46984	5.95648	7.02559	6.14992	0
10.963	6.09135	7.53541	5.35964	6.71956	6.26169	0
11.7358	6.59632	6.68236	5.60565	5.1378	6.24562	0
11.7545	6.487	6.79044	5.82395	5.41989	6.25176	0
11.7347	6.65773	6.47419	6.27928	5.02417	5.82702	0
12.0358	6.49928	6.88806	6.05134	5.18804	5.88796	0
12.6402	6.45993	7.54804	7.79687	6.90652	6.62099	1
12.7043	6.55081	7.629	7.94292	7.14372	6.53263	1
12.7289	6.57398	7.40213	7.7318	7.06614	6.53106	1
10.3006	6.77818	7.48195	7.3663	6.71683	6.26356	1
10.2467	7.02725	7.36329	7.3544	6.48968	6.20842	1
10.3203	6.69053	7.35135	7.34112	6.45172	6.59033	1
12.6732	7.0755	9.15693	7.38894	7.96557	6.6322	0
12.6343	7.03413	9.13772	7.38483	7.82046	6.70404	0
12.5935	7.21554	9.13094	7.22647	8.05897	6.65139	0
12.5376	6.88598	7.83583	6.88598	7.45644	6.54045	0
12.5421	6.95419	7.73171	6.83972	7.80687	6.59967	0
12.4568	6.96327	7.736	6.82965	7.52291	6.65607	0
12.8384	6.31025	8.04406	7.26978	6.76244	6.38986	1
12.8643	6.21994	7.99249	7.27518	6.94053	6.28949	1
12.806	6.28927	7.9412	7.23899	6.81329	6.20827	1
10.4519	6.49338	6.83738	6.79093	6.59775	6.19191	1
10.4032	6.26848	7.10884	6.86953	7.02524	6.05456	1
10.3532	6.21591	6.61716	6.87038	6.82149	6.09249	1
12.7513	6.61622	7.53163	7.00317	6.73807	6.47413	0
12.6831	6.75171	7.69813	6.8209	6.55175	6.25114	0
12.6272	6.61465	7.74034	6.91383	6.57202	6.31504	0
12.9058	7.11733	7.77202	6.97321	7.28811	6.49436	0
12.9805	7.10174	7.73441	6.84188	7.14488	6.56616	0
12.9316	7.21998	7.73947	6.82041	7.17437	6.80406	0
