# Supplementary material
Source: Research Square preprint supplement (doi:10.21203/rs.3.rs-8614090/v1)
Supplement: Supplementary file 3 [file 922622e246eb45159d17398a.xlsx]

## Sheet: Supplementary File 2.docx
	Supplementary File-2:
CXCL8	HERC2P2	LOC105371874	HSPA2	NPY	LOC107987008	PTGER2	LOC112268045	LOC105379442	KCNE4	CLDN11	ABCA8	GREM1	LOC107987071	BOK.AS1	SLC1A7	BVES	PAPLN.AS1	RASSF9	LRRC63	BOK	SRPX2	LACC1	COL6A4P2	ACTA1	MYBPC2	EFHD1	LOC107987003	LOC105370803	LOC107987075	ABCA4	S1PR5	Group
6.20783	11.3679	5.12617	10.1149	6.45233	6.11039	4.90242	4.72842	4.81839	7.19735	10.473	9.81266	7.29595	3.49085	4.81839	5.85285	7.65707	5.87289	5.53697	7.00436	8.1086	7.6048	8.72893	5.34704	4.81839	4.21262	9.70382	3.64028	4.6809	5.83251	5.68121	6.77076	1
4.51524	11.0964	6.39954	11.3267	6.60728	4.76605	3.99405	4.28518	4.19676	5.81081	11.5619	11.7109	10.2735	2.80926	6.29238	3.87463	8.32103	5.15522	4.4435	8.73747	10.3272	6.34697	9.8246	5.02249	4.36708	4.51524	11.1373	3.35094	5.73022	5.58458	5.31389	8.14867	1
3.60886	11.2985	6.4504	11.5683	7.25597	5.49034	3.78258	6.18947	6.09847	6.31588	11.4434	11.9241	10.5692	4.72918	6.05067	4.35412	8.54231	4.85217	4.43917	8.58858	10.2721	6.73234	9.55822	5.20894	4.5928	3.60886	10.5459	3.92646	5.8129	5.20894	5.16349	8.2336	1
5.28714	12.0012	5.88729	10.4245	6.51167	5.51741	4.58624	5.24466	5.05987	6.22297	9.83995	11.1354	8.74856	4.43307	6.24415	4.65611	8.04197	5.2008	4.15669	7.27606	9.92694	6.01654	8.16826	4.51211	4.58624	4.51211	10.5936	3.92206	5.61951	5.99162	4.8449	7.05566	1
4.83451	11.8774	4.7787	9.76382	5.92845	4.72032	4.20634	4.88798	5.21122	8.31414	8.48738	9.88489	7.57997	4.00239	4.59465	4.65908	7.4007	4.7787	5.60053	6.56494	8.0798	7.05947	8.29562	4.7787	4.52662	4.29528	9.7655	4.00239	4.45449	5.66083	5.63101	5.12664	1
5.27737	11.6642	6.10516	10.9914	7.56254	6.17682	4.01706	5.90828	5.46413	7.67721	11.2822	11.6314	9.30324	4.89336	6.51692	5.40468	8.67188	6.02968	4.19152	8.90393	10.4854	7.45232	9.15738	5.13681	4.5928	4.01706	11.2466	4.01706	4.5928	5.57584	4.4738	7.72539	1
5.06586	11.1778	5.11221	9.63314	6.58845	5.50455	4.40028	4.40028	4.31692	7.32474	9.9903	9.63694	7.46839	3.89846	4.61976	3.58836	7.03258	5.11221	4.96797	6.89928	7.92565	6.40334	8.55536	5.2423	4.47803	4.22687	9.5204	3.36347	3.89846	5.6032	5.47003	6.43883	1
5.60196	10.471	6.44345	11.8472	7.11629	5.44451	4.22935	4.74996	4.42953	5.31328	11.8102	11.8888	10.6189	2.80926	6.17391	3.83284	8.48569	5.0049	4.67737	9.15339	10.2664	7.12901	9.83613	5.11581	4.22935	3.98346	11.5937	3.83284	5.52548	5.48559	4.8186	8.95018	1
4.91305	11.2214	4.85175	10.664	8.04749	7.36726	4.71952	3.96347	4.40314	6.29354	11.0043	9.99165	8.88148	3.96347	5.70335	4.78736	7.59646	5.23062	5.02761	7.43796	9.57256	6.80405	8.56286	5.2769	4.85175	5.02761	10.5434	2.80926	4.6478	5.7363	5.18269	7.86908	0
4.88829	10.472	5.8147	11.185	7.09136	6.87203	4.54999	5.41222	4.48332	6.59866	11.6959	11.3844	9.08765	4.48332	5.19552	4.98363	7.76175	5.19552	4.88829	7.87223	9.00121	8.52212	10.0431	5.34377	4.41268	4.25686	10.8945	3.71828	5.8147	5.19552	4.98363	7.87812	1
3.48849	11.5589	4.76818	9.44793	6.4035	4.89612	3.48849	4.7225	4.93608	6.55778	8.20339	9.2982	7.68138	3.96543	5.1532	4.97485	6.86374	5.57916	3.86917	6.80346	8.87558	5.62713	7.45904	5.24976	4.76818	4.7225	9.92865	4.40572	3.29175	6.01553	5.21834	6.0852	1
4.29935	11.1703	4.3819	9.95696	6.82808	6.16017	4.29935	4.45892	4.11302	4.5312	9.46775	9.23092	7.47643	3.74629	5.13235	4.89328	6.60312	6.09638	3.57871	6.73398	8.59421	8.12537	8.51589	5.17539	5.08789	5.04187	9.8809	3.35653	4.29935	5.47767	5.29677	6.13923	1
4.72751	10.8498	4.62467	9.7185	6.4108	5.67195	3.90164	4.17293	4.17293	6.59923	8.43446	9.03764	6.66092	3.79078	4.51241	4.86753	6.66092	5.37474	4.17293	5.89604	7.76101	6.22671	8.01265	4.82255	4.72751	5.07163	9.67156	3.66325	4.00056	5.03327	5.81066	6.35205	1
4.6022	11.4661	4.87882	9.82642	6.02608	6.21212	4.80578	4.5103	4.76762	7.19825	9.93308	9.46861	7.66982	3.58005	4.35756	5.86415	7.83875	5.57956	4.5103	7.01946	8.05809	7.15733	8.68906	5.53679	4.98117	4.80578	9.55367	3.58005	4.76762	5.32592	5.22058	6.49122	1
4.25547	11.2114	4.65466	9.8982	6.61032	3.92112	3.92112	4.15557	4.15557	5.68167	9.2522	9.10527	8.25634	3.60494	5.0077	4.51075	7.07697	5.40528	4.34703	6.30372	8.59514	5.40528	7.95299	4.72075	4.65466	5.10683	9.70383	3.77787	3.60494	5.61759	5.15374	6.6738	1
4.84792	12.2248	5.27254	9.92905	5.59481	5.02355	4.2029	6.41403	6.61917	6.98501	9.61269	10.2759	8.45393	4.9676	5.12879	4.84792	7.3922	5.44314	5.22631	7.1738	8.74283	7.36149	8.0671	5.59481	4.78362	4.2029	9.50691	4.64426	3.96109	5.79509	5.85593	6.52956	1
6.01113	12.4917	5.18247	9.83178	5.55874	5.82031	4.27533	5.82031	5.63863	7.36465	9.09282	10.037	7.08578	4.94569	5.55874	5.42949	7.64627	5.38355	4.27533	6.28103	9.16395	6.32934	7.47549	4.87915	4.87915	4.48083	10.1039	4.65579	4.02241	6.04056	5.78582	6.4434	1
4.58603	12.0804	5.91113	10.5774	6.68189	4.41641	3.40311	4.98834	5.2952	7.44238	9.89885	11.3503	9.22135	3.64337	6.2709	4.80307	8.21386	5.50648	4.41641	7.72329	9.84696	6.9021	8.72185	4.50423	4.32138	4.10278	11.0154	3.97351	5.65484	5.65484	4.21759	6.93096	1
4.78573	12.0846	5.41468	10.1578	6.57971	6.016	3.82371	5.47604	5.67153	7.3617	10.3891	10.4396	8.40833	4.88288	5.86571	5.72267	7.88189	6.016	4.50368	8.2114	9.62623	7.48333	8.01381	5.17509	4.88288	4.36937	10.302	3.93796	4.50368	5.77199	4.56553	6.7352	1
4.45731	11.1136	5.15196	10.2152	7.37945	5.52529	4.25424	4.32604	4.00453	6.13316	10.6662	10.032	8.34974	3.51228	5.07829	4.09461	7.70154	4.82868	3.90532	7.25646	8.83333	5.90406	8.89123	5.25537	4.63034	4.73343	10.0826	3.66618	4.17741	5.38197	5.00027	7.4513	1
6.04156	10.4039	4.98784	9.88895	6.67859	5.55618	4.66792	4.57338	4.57338	6.25445	9.30666	9.22685	7.48935	3.83621	4.79748	3.92975	6.71992	5.15397	4.23385	6.25445	7.98361	6.6994	7.97088	4.95194	4.75576	4.23385	9.85819	3.46685	4.0148	5.50892	5.15397	6.24026	1
4.68078	11.2958	4.76457	9.04029	9.53076	6.83424	4.07011	4.1417	4.59091	7.01265	9.69488	8.91162	6.75996	4.2718	5.70842	5.68824	7.28802	5.53815	5.64699	6.30347	9.65334	8.47023	8.0369	5.89558	6.36763	6.26354	9.39221	3.81744	3.81744	5.74791	4.98722	6.63038	0
4.73965	11.6071	6.08336	11.1883	6.70601	6.31698	4.62956	5.42136	4.62956	6.99096	11.5474	11.1945	8.45138	4.84087	5.70443	6.44371	7.75146	5.51254	4.5086	8.37839	9.44538	8.21146	9.44726	5.35702	4.93466	5.02213	10.8248	3.94143	4.93466	5.28947	5.42136	7.82852	1
4.96513	11.2171	4.6989	9.7737	6.7078	5.44453	3.5669	4.09381	3.98795	6.53301	9.11862	9.34394	7.98386	2.80926	5.14468	5.30289	7.17213	5.30289	3.73206	6.69403	8.38069	6.18348	7.92044	5.14468	4.57433	5.87463	9.83903	2.80926	2.80926	5.18602	5.05796	6.85119	1
4.15244	10.6557	6.46806	12.1961	7.5822	5.89973	4.15244	4.70041	4.79444	6.74674	12.3796	11.5945	9.83077	3.64987	6.50765	4.70041	9.44306	5.28035	4.29876	9.13292	10.387	7.08794	10.4183	5.14891	4.15244	3.88482	11.2049	3.29913	5.07801	4.70041	4.6506	9.00356	1
5.3395	11.4811	6.14305	11.519	7.00373	4.3592	4.18962	4.63803	4.91594	6.40307	11.7361	11.5757	9.99089	4.43531	6.41994	3.73197	8.49164	5.18582	5.41027	8.79768	10.4966	6.70755	9.82466	4.91594	4.27765	4.3592	11.2048	3.86898	5.96976	5.8744	5.10184	8.31917	1
5.27416	11.8755	8.47968	13.4267	6.18844	4.93908	2.80926	5.27416	5.11716	7.90484	13.1375	14.0937	11.4646	4.73261	8.70909	5.11716	10.3259	5.2366	4.84001	10.5347	12.7192	7.22107	10.8768	4.4852	3.85466	3.71937	13.3787	4.4852	6.9781	4.8905	4.07665	10.1564	1
5.41874	11.1033	5.17068	10.2719	6.59526	6.2297	4.23993	5.45075	5.17068	7.78357	9.96301	10.3932	7.69515	4.53027	5.17068	4.70924	7.92909	5.31794	4.96032	7.45467	8.87934	7.39974	8.21446	4.76357	4.23993	3.70714	10.4072	3.84075	4.39423	5.2826	4.59288	6.53805	1
4.60709	11.6194	7.10166	12.583	8.23824	4.89883	4.00454	5.13652	4.22198	7.22634	13.5121	12.7485	10.919	4.15442	7.04699	4.28558	9.85876	4.50935	3.92015	10.4728	11.2321	6.59171	10.9528	5.25537	4.00454	4.34574	12.3258	3.82734	5.07287	5.03986	4.65317	10.014	1
5.37821	11.2566	5.17454	10.6329	7.93878	6.97289	4.97129	4.17926	4.59011	6.27993	10.5005	9.86275	8.56169	3.47374	5.45694	5.29465	7.8797	4.68534	3.47374	7.45672	9.34667	5.92796	8.57033	5.37821	4.68534	5.48221	10.3572	3.61959	3.8467	5.48221	5.1102	8.04187	0
6.27324	11.2307	5.24596	10.1179	5.50357	6.88391	5.41257	5.28096	4.62273	7.66505	10.2508	10.1965	6.91666	4.36792	4.78398	6.03385	7.29411	5.34836	5.4739	6.85039	8.10377	8.43211	8.49112	5.61623	4.56393	4.62273	10.0534	4.03864	5.01424	5.1731	5.97232	6.4027	1
5.01911	10.7346	4.83803	9.65852	7.20667	5.44904	3.53496	4.21921	4.37165	5.99919	8.44688	9.27984	6.9764	3.53496	4.78848	4.56804	6.91255	5.7262	2.80926	6.75148	8.19365	6.43973	8.12975	5.25117	4.68314	4.68314	9.7809	3.53496	3.69354	5.25117	5.64872	6.61083	1
5.60842	11.4143	5.17379	10.3076	6.79485	6.13061	4.23329	5.12154	5.68099	6.43017	10.3587	9.99871	8.16229	3.98679	4.75503	3.65313	7.53316	5.17379	5.40834	8.25264	8.54255	6.81085	8.78783	5.57066	4.23329	4.88905	10.2807	3.41015	5.27254	5.22407	5.22407	7.35951	1
6.1198	10.6419	5.05112	9.95199	7.04141	5.4216	4.39622	3.84212	3.84212	4.5324	9.62899	9.18915	8.16741	2.80926	4.86815	2.80926	6.40365	4.96284	4.39622	5.99674	8.31912	6.69364	8.40143	4.96284	5.13385	5.90829	9.64258	2.80926	4.24176	4.96284	4.96284	6.79494	1
6.1563	10.8539	5.16371	10.009	6.31889	5.89697	5.16371	5.36801	5.54561	6.93337	9.63724	10.0325	6.64371	3.90207	4.13297	3.76109	6.62834	5.4773	3.90207	6.41181	7.84525	7.77051	8.13785	5.57853	4.32172	4.13297	9.7351	3.76109	4.4053	5.11884	5.32955	6.19873	1
5.52455	10.501	5.25467	10.5614	7.96362	6.82878	4.68238	4.17697	4.62978	5.62933	10.6577	9.85983	8.51193	4.09419	5.11496	4.39304	7.64047	4.78135	4.78135	7.76397	8.43973	6.95291	9.00189	4.73284	4.73284	4.82807	9.85455	3.51204	4.57483	5.28744	5.22109	7.54528	1
4.76523	10.8542	4.59443	8.88493	6.41864	6.54047	3.9578	5.05035	5.38796	5.76329	8.46675	8.89063	7.58957	4.39563	4.32107	3.84171	6.79391	5.65825	5.35436	6.49599	7.46494	6.23203	8.08399	5.24825	4.76523	4.86743	8.89632	3.54693	3.84171	5.17258	5.28456	5.57391	0
6.35379	11.4191	4.77715	9.44347	6.40205	6.15663	4.12204	6.17067	6.82055	6.48276	9.47881	8.98389	7.55825	5.61251	4.12204	3.80214	7.10095	5.05568	5.11694	6.39014	7.71839	6.06939	8.45487	4.36547	4.46991	4.85262	9.39101	4.73766	4.18819	5.38714	5.41142	5.8939	1
5.18452	10.3869	5.04424	10.4703	7.01009	5.94712	3.91327	5.04424	5.09267	6.24506	10.2847	10.0306	8.09511	4.03658	4.94169	3.5992	7.53161	4.94169	4.42087	7.02214	8.51622	6.71581	9.08724	4.94169	3.5992	5.04424	10.1841	3.37127	4.33661	4.99397	5.04424	7.04592	1
4.50373	10.8974	6.15187	12.2252	8.32013	5.383	3.97315	4.10238	3.97315	5.383	12.2331	11.2714	10.2094	3.97315	6.62912	4.58551	8.70853	4.92889	6.24723	9.0142	10.6722	7.226	10.071	4.58551	4.32093	4.8025	11.7029	3.97315	5.24805	4.8025	4.58551	9.22624	1
6.00957	11.1687	5.26009	10.1637	6.63542	6.09006	4.44745	5.63162	5.8795	6.76283	9.65823	10.5766	7.74695	5.02745	4.79619	3.82966	6.85717	5.96754	3.94451	6.84572	8.46304	7.52128	8.3218	5.8566	4.84588	4.84588	10.0797	4.63417	5.26009	5.5186	5.29521	6.35668	1
4.23715	10.4319	6.59467	12.7075	7.91225	6.03086	4.52703	4.52703	4.43824	6.80228	12.5363	11.7786	10.5163	3.41189	6.64947	3.41189	9.40209	5.37055	5.57693	9.86259	10.842	7.66981	10.2557	5.22985	4.34215	5.22985	11.5271	2.80926	6.03086	4.68711	4.60969	9.7997	1
3.72132	10.8527	6.60726	12.1396	7.96485	5.80357	4.07928	5.00144	5.06821	5.72543	12.0966	11.9504	10.4238	4.60316	6.79849	3.72132	8.98363	4.89443	4.96674	9.2759	10.7951	6.36104	9.56918	5.06821	4.96674	5.00144	11.7012	4.21875	4.81783	4.96674	4.93109	9.42011	0
4.90085	11.7605	4.97971	10.2317	6.14154	6.26715	4.72694	6.56436	7.08918	6.85068	10.4575	10.3855	9.01309	5.67928	5.19134	2.80926	7.7958	4.90085	4.81686	8.38908	8.74532	5.7677	9.19643	4.52489	4.52489	4.28148	10.1812	5.05408	4.63007	5.67928	5.31584	7.90527	1
4.15345	10.6092	5.84489	11.3978	7.80567	5.91704	4.00367	4.89746	4.93416	5.96882	11.4194	10.9308	8.54486	3.60364	5.58077	2.80926	8.07047	4.93416	4.69631	8.44911	9.52646	6.8122	9.86895	4.93416	4.40176	4.15345	11.0213	3.60364	5.00458	5.25384	4.96985	8.17213	1
5.10412	11.1303	5.29128	10.1647	6.56959	5.67031	4.07373	4.28815	4.62347	4.62347	10.0785	9.89068	8.86797	3.38911	4.99966	3.80074	7.26405	5.20096	3.80074	7.55609	8.47055	6.9247	9.14742	4.94413	4.46772	4.76163	10.0922	2.80926	4.38144	5.60239	5.33427	7.33769	1
4.7022	10.3525	6.32663	12.3007	8.05184	6.43064	4.28048	4.22249	4.38813	6.62805	12.3586	11.5526	10.2527	3.68256	5.98986	4.09621	9.29358	4.85123	6.55846	9.94981	10.1895	7.71684	10.3871	5.29439	4.43839	4.33559	11.0135	3.56837	6.0783	4.85123	4.53287	9.34	1
3.96559	10.802	6.45193	11.8975	8.88762	6.15519	4.25068	5.26243	5.10592	5.87711	11.7637	12.0694	10.0273	4.82974	6.48309	4.16404	8.9882	4.33097	5.82899	10.0207	10.4963	6.89526	9.89397	5.06375	4.33097	4.77738	11.4633	4.16404	5.8043	4.60576	4.72275	9.24692	0
4.86592	11.9253	6.68554	12.3073	6.60951	5.63925	4.13134	6.77174	6.90479	8.34031	12.5601	12.2329	10.6858	5.47454	6.40858	4.2297	9.09847	4.75041	5.75823	10.0389	10.6237	6.79936	10.6513	4.55432	4.40339	4.2297	11.8627	4.62321	6.25692	5.70001	4.48126	9.59282	1
4.48386	10.6834	6.21012	11.7523	7.38146	5.83615	4.02472	5.11199	5.14971	5.94458	11.7567	11.3581	8.75657	3.92399	6.1209	4.11614	8.42111	5.2221	4.99193	9.00648	9.81443	7.0484	10.3023	4.90531	4.02472	4.41925	11.2508	4.02472	5.25688	5.03318	4.85973	8.58211	1
4.70946	11.4776	5.44238	10.0575	6.7012	5.09826	3.41994	4.91842	4.98115	7.72366	9.0813	11.2758	8.3439	3.41994	5.60595	4.36116	7.83266	4.91842	4.63133	7.54785	9.22961	6.73628	8.9045	5.35265	3.85206	4.00523	10.7317	2.80926	4.70946	6.08984	5.91579	6.47047	1
4.67395	11.5042	5.35863	9.77539	5.62326	6.82003	4.67395	5.40643	4.75347	8.77165	9.62887	10.1897	6.49252	4.39865	4.67395	5.58253	7.23563	4.89892	6.09541	6.35628	7.98261	6.91979	7.99787	5.25766	4.39865	4.89892	9.78421	3.68876	4.0352	5.87912	5.77515	6.23184	1
4.66623	11.8671	6.09386	11.4437	7.39308	5.51631	4.86746	6.74952	6.86425	6.11267	11.2819	11.374	9.03595	5.54465	5.80011	5.08146	8.21791	5.39671	4.95732	8.31358	10.0019	7.79621	9.23814	5.54465	3.92865	4.35702	11.3215	5.29959	5.72828	5.12038	5.15819	7.8134	0
4.46677	9.733	4.56912	9.10416	6.262	5.29623	3.92687	4.56912	5.23915	5.68305	8.58411	8.64382	7.66108	4.35466	4.46677	4.75117	6.262	4.83314	4.75117	5.40363	8.14731	5.9852	8.2487	5.05173	4.56912	5.72459	9.36823	4.08982	3.92687	5.35099	5.29623	5.5504	1
5.20034	11.2206	5.97527	11.8911	7.82049	5.78864	3.93824	4.10266	4.58587	5.26028	11.837	11.4295	9.841	3.73862	6.31533	3.93824	8.16898	5.20034	3.47199	8.63023	10.6924	6.0098	9.81713	5.37272	5.00246	5.20034	11.772	4.36974	4.24434	5.37272	5.00246	9.02155	1
4.6294	11.4959	4.32523	9.45697	5.82276	5.73794	4.02716	6.05019	6.14057	7.00102	8.568	8.53539	7.93574	5.29504	5.12369	3.90471	6.55518	5.29504	4.75693	6.22552	8.77418	6.07333	7.12701	5.82276	5.02898	5.25421	9.89461	5.29504	4.13611	6.00273	5.58396	5.90273	1
3.98681	9.84854	5.51869	10.7962	7.40234	5.54494	3.88893	4.23331	4.55069	5.46464	10.7549	10.4544	9.38858	4.23331	5.90882	4.37093	7.81487	4.75506	3.88893	6.97131	10.1537	5.94831	8.87514	4.70704	4.65709	4.43396	11.0161	3.65314	4.37093	4.55069	5.04855	7.78825	1
4.55335	11.5682	4.62889	10.0634	6.89171	5.83446	4.07775	4.29274	4.89213	5.53814	9.97007	9.54169	8.47522	4.07775	5.38286	4.62889	7.48352	5.05926	3.80396	6.84882	9.47767	6.89171	8.31165	5.50094	4.83127	4.95026	9.74186	4.07775	4.55335	4.83127	5.64409	7.02608	1
5.13437	11.0655	5.28591	10.3559	5.65973	4.44379	3.84238	5.54606	5.23728	7.25239	9.60333	10.349	7.81434	4.53282	5.50599	4.24212	7.83029	5.7648	4.53282	7.15427	9.42062	6.71171	8.68902	5.07979	4.90097	3.84238	10.4772	4.24212	4.69332	5.54606	4.69332	6.52747	1
4.25638	10.9377	5.11871	9.80761	6.45189	6.733	4.52027	5.35468	4.83148	6.93799	10.1051	9.43237	7.82997	4.63293	4.96239	5.73107	7.43439	5.29137	5.22494	7.3388	8.54394	6.20578	8.60518	4.87661	4.45971	4.7847	10.0792	3.51339	4.73613	5.25856	5.35468	7.21169	1
5.1208	12.2945	5.28469	10.6093	6.54176	5.62442	4.71524	6.32137	6.74628	6.12503	9.96045	10.3273	8.01067	5.6542	5.24556	5.89695	7.71043	5.92149	5.56286	7.51719	9.40639	7.28458	8.42066	4.98312	3.87909	4.29113	10.6996	5.1208	4.65412	5.49843	5.28469	6.69077	0
4.42688	9.82499	4.72102	9.54679	6.65269	5.19658	4.66759	4.72102	5.33442	5.00155	8.9632	9.08861	7.76345	4.72102	4.86893	4.20688	7.03277	5.08304	5.00155	6.66544	8.56647	5.93548	8.25839	4.49174	4.66759	4.95883	9.80363	3.81607	3.81607	5.1598	5.08304	7.04255	1
4.23339	10.8799	5.78336	10.3737	7.33046	5.08568	4.30431	4.97136	5.08568	6.19761	10.1328	10.924	8.98478	4.55078	6.30746	4.43405	7.89705	5.31948	5.73886	7.92174	10.3218	6.81104	8.92743	5.1909	3.98688	4.15752	10.7735	3.77932	5.71606	5.01058	5.04866	7.92174	1
4.66476	10.9466	6.25986	11.4027	7.07791	5.81137	3.66351	4.62518	4.77646	5.51849	11.3744	11.3668	9.94571	3.761	6.2478	4.70312	8.49137	5.03387	6.60945	8.34182	10.6096	6.93562	9.28033	5.45594	4.19301	4.58428	10.8604	3.761	5.22392	4.8791	4.8791	8.45801	1
4.25315	11.2761	4.39237	9.05908	6.38834	7.02888	4.51656	5.15039	4.78056	6.606	8.85238	8.90435	7.28607	4.17638	4.51656	5.46805	7.08413	4.82727	4.73206	7.07507	7.85017	6.04029	8.33619	4.51656	4.25315	4.68162	9.62608	3.30841	4.25315	5.22018	5.18574	6.64335	1
5.30834	10.4638	6.04104	11.6528	7.93221	5.70678	3.78859	4.86343	4.60297	5.70678	11.4335	11.3702	9.27403	4.05858	6.31102	3.38183	8.46277	5.02895	5.76833	9.0023	10.3032	6.15984	9.83498	5.02895	4.36318	4.52829	11.4253	3.61386	5.96464	4.2708	4.80319	8.5515	1
4.64792	10.7394	6.86654	12.0681	6.92733	4.5161	4.10107	6.21749	5.58578	7.41678	11.9467	12.4064	9.79401	5.52293	7.51493	3.73744	9.24905	5.55471	5.27705	8.95523	11.716	7.42522	10.0914	4.92693	4.10107	4.36787	12.1877	4.44433	6.09486	4.767	4.44433	8.21485	1
4.08696	11.5228	5.56069	11.1333	7.34283	5.78585	4.42709	5.09119	6.04601	6.06743	11.7412	10.9443	8.71647	4.2701	5.8116	4.08696	8.57564	4.62899	4.56539	8.10276	9.80876	6.56458	9.71284	5.29143	4.18245	3.9816	11.4661	3.9816	4.68947	4.80229	4.49825	8.01817	1
3.33204	11.0215	6.07159	11.4187	7.30316	5.73075	4.1511	4.70558	4.95632	5.56712	11.5112	11.2846	9.91148	4.1511	6.00972	3.54465	8.44261	4.5894	5.65135	8.35919	10.1964	5.67832	10.1357	4.75984	4.70558	4.64886	11.4083	4.05752	5.08634	4.75984	4.5894	8.44261	1
4.04683	11.2925	5.56583	10.8058	7.44465	5.40118	4.23981	4.94794	5.15223	5.69889	10.9337	10.5417	9.2022	4.40368	5.41856	4.19476	7.94281	4.84577	4.09852	7.44465	9.54982	5.38357	9.60164	4.84577	4.40368	4.97227	10.8668	4.04683	4.14774	4.67532	5.01961	7.98318	1
3.33122	11.4732	5.20162	10.6564	7.29045	5.50464	4.14912	4.38879	4.45858	5.56374	10.1654	9.96571	8.834	4.80912	5.6479	4.64629	7.67845	4.85905	4.70296	6.78184	9.81935	5.23883	9.62966	4.99818	4.52446	4.85905	11.254	4.3145	3.33122	5.37821	4.99818	7.85661	1
5.74119	11.0702	5.68988	11.2871	7.66444	6.90799	3.8319	4.98859	5.36754	8.14834	11.1393	11.212	9.24103	4.57869	5.71577	5.07349	8.26493	5.15327	4.74834	7.7158	9.77465	6.82836	10.0826	4.80014	5.15327	4.22809	10.8568	4.22809	4.45085	5.43206	5.33411	8.41609	1
4.97096	11.1402	5.66884	11.0721	7.09356	6.95341	3.5896	4.74954	5.11533	7.12656	11.043	10.7017	9.21906	3.90016	5.5746	5.11533	8.40301	5.43802	5.47346	7.96087	9.49803	7.21102	9.62439	4.91907	5.16016	4.31918	10.535	3.75941	5.06894	5.43802	4.31918	8.22695	1
5.42492	11.0807	5.3223	9.99591	5.56572	7.09661	3.91193	4.64053	5.21128	6.63636	9.63173	10.1907	8.52816	4.21181	4.8086	4.8086	7.33337	5.15214	4.54708	6.63636	8.70206	5.91845	9.77072	5.02532	4.64053	4.44576	10.1693	3.45607	3.71663	5.3223	5.3223	7.08139	1
3.81318	12.9561	5.29525	10.1959	7.02503	4.35397	3.52615	4.48722	4.48722	5.36069	9.85693	10.2345	8.52048	3.52615	5.74785	4.9093	6.96491	6.05043	2.80926	8.14147	9.77493	6.36319	8.35901	6.05043	4.35397	4.60697	10.0852	3.81318	3.52615	6.74406	5.74785	7.37202	1
4.84362	11.082	6.77688	11.5187	7.84919	5.3974	4.77942	4.84362	5.07258	6.57789	11.878	12.1337	9.97512	4.08619	7.01846	3.39511	9.15915	4.71179	4.19973	9.16799	11.001	6.82258	9.85064	4.39644	3.81074	4.6403	11.7847	3.63228	5.26765	5.26765	5.01899	9.58168	1
4.71277	11.2642	5.20234	9.84232	6.26171	5.70865	5.20234	4.82662	5.31973	6.35398	9.66959	10.0275	7.74756	4.51967	5.02787	3.5731	7.22345	5.16082	4.58748	7.25235	8.89323	5.94222	8.30626	4.77098	5.02787	4.71277	10.4067	4.28911	4.1039	5.55969	5.84319	7.7543	1
4.40598	11.3553	5.97365	10.2518	6.46594	5.51288	4.92322	4.97518	5.4783	6.32004	10.1294	11.2124	9.11454	4.02479	5.16463	3.90256	8.21289	5.16463	4.13356	8.33586	9.4555	5.87191	9.53155	5.02515	4.23205	4.48396	10.7897	3.59136	4.40598	5.67388	5.44282	8.62921	1
3.34704	10.4776	5.22242	10.6973	5.91883	5.50624	4.3567	4.69579	5.00889	5.05443	10.1662	10.4545	8.88883	3.73039	5.22242	4.63516	7.71998	5.05443	4.86187	7.26308	9.21254	6.49705	9.12613	4.27525	4.91275	4.18734	10.432	3.56551	4.96171	4.50406	5.14107	7.27233	1
3.70236	10.2198	5.37464	10.6729	7.14188	5.53081	4.14695	4.70007	4.95028	5.0382	10.0146	10.4277	8.9741	3.95074	5.43926	4.75421	7.75635	5.37464	4.14695	7.05406	9.23317	7.04396	8.97145	4.85599	4.64348	4.05363	10.5341	3.70236	5.15998	4.05363	4.45599	7.55809	1
3.74618	10.9561	5.25726	9.99606	6.29841	5.17514	4.00561	4.66373	5.08764	4.45873	9.20085	10.2323	9.09712	3.74618	5.29651	5.13211	7.25252	5.29651	4.38172	8.20208	8.95005	6.74749	9.32771	4.66373	4.29917	4.38172	10.1003	3.35646	4.59917	4.78357	5.33466	6.98763	1
5.95233	11.2175	5.58359	11.0501	5.86102	5.79666	4.24125	5.13311	5.62145	6.69267	10.937	10.9083	9.11522	3.41373	5.95233	2.80926	8.54489	5.02163	7.4701	9.4135	10.1199	6.06553	9.02818	5.58359	3.99353	4.76527	10.8431	3.41373	6.14484	4.76527	5.33154	8.33769	1
5.51982	11.6792	7.67084	13.1897	5.39167	5.09218	3.66403	5.19959	5.03503	7.94026	13.2945	13.1994	10.9043	4.00162	8.13498	4.13363	10.5172	4.97529	8.73753	11.443	12.5318	7.77473	11.0766	5.34614	3.41803	3.41803	13.1197	4.13363	6.89163	4.97529	4.00162	10.4806	1
5.61357	10.4304	4.60425	10.1763	6.44961	5.26362	3.58102	4.78905	5.13825	6.75557	9.0001	9.47849	7.74879	3.35819	5.09371	3.35819	7.44256	4.89875	3.35819	7.09702	8.79518	5.4145	7.84869	4.95028	4.3863	4.60425	10.1915	3.58102	4.21419	4.73044	5.61357	6.96051	1
4.99418	11.7778	7.48923	12.6211	5.13961	4.57331	4.83055	5.09289	5.72674	9.91654	13.342	13.1478	10.756	4.14641	8.44695	4.03671	9.92456	5.22842	7.86128	11.1697	12.5678	8.94342	10.7442	4.77102	3.77107	3.91339	12.5937	4.14641	8.03741	5.22842	4.9419	9.87741	1
3.69677	11.6159	5.47218	9.98063	5.86646	4.51186	4.18235	5.22259	5.96587	6.69872	9.85407	10.8215	8.42509	4.18235	6.02845	3.44169	7.29842	5.72188	4.91568	8.92511	9.99619	6.97565	8.86285	5.27632	4.41221	4.04605	10.1963	3.88814	6.37902	5.27632	5.51706	7.61322	1
6.3973	9.4124	6.03653	11.4544	7.04152	6.65559	3.88834	5.48395	5.44959	5.51747	11.1602	10.7777	9.30172	4.38619	5.99012	3.749	8.34436	5.7318	4.30345	8.19556	10.2509	7.22147	9.4124	4.89862	4.30345	4.89862	11.4411	4.30345	4.21409	5.18121	4.46338	9.1166	1
7.11787	9.17649	6.34024	11.76	6.53329	6.62646	3.94934	4.78684	5.22057	5.64132	11.468	11.5722	9.92941	4.4983	6.35396	3.7479	8.47168	4.86991	4.03571	9.01873	10.4512	7.27675	10.1415	5.1894	4.55137	4.4983	11.5834	4.03571	4.90951	4.98526	4.32302	9.42087	1
6.5288	9.04012	6.01826	11.9262	7.00985	6.59097	3.88026	5.46745	5.6269	5.43321	11.592	11.396	10.1434	5.03277	6.36036	3.74189	8.32265	5.123	4.10709	8.22849	10.4912	7.4468	9.91619	4.98523	4.5237	5.123	11.7591	3.74189	4.98523	5.07865	4.65599	9.44144	1
4.64106	11.4935	7.0846	12.306	5.82839	4.64106	3.87089	5.74944	5.92718	6.9283	12.2958	12.3223	11.3647	4.81521	7.28194	3.87089	9.10032	5.14811	7.90149	9.88856	11.5881	8.06023	10.5628	4.86831	4.19203	3.98993	12.3631	4.09595	6.22681	4.91931	3.87089	9.48905	1
4.33588	10.6977	7.12259	12.657	7.62303	5.01334	3.80083	4.64174	4.74532	7.226	12.7198	12.2515	11.3834	5.23572	7.48406	3.67207	9.0393	4.79406	5.89923	9.1658	11.7836	6.93174	10.4591	4.69461	4.58651	4.97235	12.7843	3.91272	5.56733	4.33588	4.01254	9.93008	1
3.769	11.2266	7.8007	12.3601	6.52023	4.5698	3.91105	5.45974	5.45974	5.99236	12.5457	12.8766	12.0856	4.76722	7.3566	3.91105	9.09551	4.63917	3.769	9.71225	11.6974	6.9679	10.8785	4.76722	4.03413	4.41778	12.459	4.24277	5.34698	4.33366	4.24277	9.82745	1
4.25836	10.7225	7.96017	11.8517	6.22601	3.94959	4.11548	5.44754	5.0917	7.47763	12.3313	13.3604	11.307	4.11548	8.10424	5.2813	9.14028	6.3949	7.73902	10.0882	12.5042	9.03428	11.0225	6.44702	3.74811	4.25836	12.8849	4.11548	8.51541	4.49866	4.11548	9.23903	1
3.9419	10.3268	7.36344	11.9298	7.75872	4.04407	3.9419	5.57107	5.3579	8.35975	12.307	12.7915	10.7374	4.50927	8.10234	4.63026	9.37333	5.62636	7.84692	10.1359	12.1148	8.50771	10.9782	5.94048	3.69531	3.9419	12.6612	3.9419	7.38718	4.68654	3.82728	9.32505	1
3.88993	9.99687	5.93093	11.2624	6.82394	5.49398	4.30557	3.88993	4.15867	5.69489	11.2086	11.2026	9.55042	2.80926	5.7854	4.07686	8.74282	4.97303	8.00519	8.42068	10.3574	6.08066	10.1914	5.49398	3.9879	3.78017	11.2968	3.30154	5.52075	4.37232	4.6066	8.66292	1
4.29853	9.62105	5.67583	10.6936	6.76453	6.29728	4.68375	4.0421	3.43958	5.98966	10.6019	11.032	9.50437	2.80926	5.46507	4.0421	8.29595	4.68375	7.10188	7.94413	9.67962	5.98966	9.84443	5.63617	4.59843	3.69386	10.8601	2.80926	5.55327	4.0421	5.2159	8.28341	1
4.32238	9.91209	6.06644	11.2984	6.37988	5.68489	4.03518	3.94884	4.11463	5.49727	11.0114	11.0708	9.68473	3.62526	6.26848	3.85384	8.44201	4.98441	5.18849	8.15771	10.6967	5.12389	9.81339	5.33759	3.62526	3.74748	11.561	3.28453	4.74239	4.4976	5.39292	9.11255	1
4.45542	9.29602	5.47274	10.6611	7.03891	6.45327	4.20715	5.36722	5.17082	5.72	10.0832	10.8421	9.54199	4.52758	5.63237	3.74417	7.63431	4.6601	4.0031	7.67077	9.69307	6.31178	9.19959	4.45542	4.77977	4.52758	10.7709	3.88285	4.72137	4.6601	4.6601	7.60445	1
4.49066	10.9179	5.57268	11.0837	6.14071	4.39203	4.39203	4.95754	5.29983	6.14071	11.415	10.9464	9.65688	3.87386	6.27188	3.68486	7.90743	5.08169	6.4594	8.38076	10.5217	7.42732	9.52494	5.96533	4.49066	4.16465	11.5934	4.49066	5.72855	4.7457	4.28415	8.52333	1
5.05249	10.9436	6.23475	11.8871	7.20249	4.81028	3.97813	4.81028	5.47551	7.03846	12.3013	11.6601	10.3049	4.32718	6.85322	3.64676	8.52568	4.87521	5.82983	8.97205	10.9718	7.24941	10.2266	5.82983	4.22305	4.22305	11.9407	3.97813	5.73269	4.66949	4.32718	8.95803	1
5.21421	10.4565	6.06156	10.997	7.54745	5.06561	4.19497	4.83716	5.06561	6.3584	11.4445	11.268	10.2652	3.80719	6.56871	2.80926	8.40261	4.77311	4.63433	8.56656	10.4919	6.75197	10.3069	5.46976	4.29735	4.19497	11.4571	3.80719	5.46976	4.39112	3.95439	8.82527	1
4.78568	10.3423	5.30863	10.1966	6.3827	5.86423	4.33774	5.02921	4.67358	5.37886	10.1547	10.491	9.45649	4.17017	5.57019	4.41299	7.46584	4.88866	4.48364	7.45007	9.37547	6.08667	8.99097	5.0729	4.33774	4.6135	10.3132	3.55562	4.6135	4.41299	4.67358	7.73658	1
3.75999	10.509	5.70027	10.7422	7.21268	5.43934	4.13149	4.13149	4.55451	5.75849	10.7306	10.7772	9.72454	3.75999	5.84151	4.32006	7.58937	5.20477	4.22985	8.10729	9.88883	6.19588	9.26838	4.92021	4.32006	4.40356	10.6843	2.80926	4.97212	4.68863	4.55451	8.19799	1
4.684	10.4754	5.71654	10.5333	7.48794	5.76977	4.32027	4.51596	4.47002	5.60354	10.5027	10.6254	9.70456	4.08298	5.67988	4.42223	7.70969	4.89996	4.20815	7.60308	9.57581	6.28804	9.17475	4.86641	4.79657	4.684	10.8551	3.42471	4.89996	4.684	4.99569	8.0073	1
3.46017	10.9184	5.70764	10.46	6.75341	5.57952	4.22021	5.1025	5.70764	5.62355	10.5068	11.3603	8.72497	2.80926	5.62355	3.46017	7.72209	5.62355	4.45531	7.64041	9.28409	5.53404	9.21178	4.89642	4.08061	4.5571	9.95217	2.80926	4.34384	4.65097	4.89642	7.49691	1
4.12788	11.2428	5.61756	10.7488	6.72936	5.04082	3.75731	4.61871	5.24099	6.6636	10.4886	10.4373	8.73626	4.61871	5.95075	5.8746	7.86678	5.70861	2.80926	7.50457	9.72607	6.59467	8.58531	5.17755	4.51405	4.88824	10.8454	3.96059	4.96676	5.83491	4.96676	7.69156	1
3.45592	10.9388	4.64015	9.29848	6.91897	5.21083	4.54671	4.88454	5.21083	4.9566	8.59855	8.75022	7.97458	4.07267	4.72699	4.07267	6.52738	5.42444	4.21151	5.91792	8.34888	6.4343	8.16667	4.88454	4.64015	4.64015	9.6747	3.91169	3.91169	5.69297	5.42444	6.41005	1
2.80926	11.3033	6.63821	11.6575	5.60841	5.07924	3.61364	4.05826	3.38167	4.27042	11.4332	11.4414	10.0087	3.38167	6.62184	4.8027	7.81441	5.57424	4.16964	8.14607	10.9703	6.11285	9.86564	5.38935	4.67289	5.02842	11.4162	3.61364	3.93299	5.5392	4.8027	9.22284	1
4.70787	11.2593	5.70218	10.664	7.51332	5.0224	4.1967	4.64694	4.76597	7.20599	10.7776	10.4651	8.84792	4.36701	5.64458	4.44343	7.78615	6.09344	3.57091	7.51332	9.71374	6.91383	8.77075	4.58284	3.994	4.36701	11.1518	4.10034	5.48912	5.48912	5.06814	7.61995	1
4.64168	11.6	4.64168	9.27998	7.42726	6.20176	4.33582	4.69454	4.88621	5.87787	9.63738	9.52724	8.05553	4.64168	4.97227	4.01249	7.29883	4.46779	4.84093	7.23418	8.36159	5.98109	8.97646	5.76644	4.74525	5.12909	9.7059	4.33582	3.91268	5.26935	5.69504	7.25062	1
4.93564	11.2502	5.8281	10.8552	6.7241	5.58998	4.10692	4.99462	5.4739	6.77312	10.9253	11.0218	10.311	4.10692	5.97635	3.97728	7.6301	5.10517	5.79648	8.58864	9.88467	6.77312	9.75501	4.22205	4.42138	4.42138	10.9791	3.82739	5.79648	5.58998	5.10517	8.21147	1
3.90135	11.6094	4.62422	10.8069	6.27829	4.62422	4.13212	6.13296	5.32815	6.67223	9.68227	9.27717	8.11965	5.70139	5.28857	4.02346	7.96398	4.81056	3.76045	7.23437	9.14386	6.19708	7.83007	4.23052	4.81056	4.13212	10.4799	4.92112	3.90135	5.404	5.57705	7.22422	1
4.67283	12.1158	4.49659	8.99259	5.98469	4.87459	4.61687	5.52486	5.58107	6.75973	8.39541	9.01271	7.39613	4.28947	4.92041	4.36273	6.99108	4.96467	4.03441	6.89646	8.61212	6.89646	8.47375	4.82708	4.55823	4.43158	9.84815	4.43158	4.28947	5.89966	5.60834	6.75973	1
4.97511	11.7418	5.25004	10.5188	6.70468	4.97511	4.4839	5.73329	6.02179	5.64305	9.76461	10.197	8.98517	5.11967	5.57946	4.13351	7.46157	5.25004	3.76149	7.97312	9.42691	7.32557	8.66705	4.40592	4.69133	4.55705	11.103	4.32232	5.29083	5.51279	4.75337	7.15405	1
5.49439	11.488	5.05679	10.7586	6.00158	4.85365	4.22056	6.07077	6.02502	5.9535	10.0575	10.3963	8.76134	4.67697	5.56079	5.10301	7.89378	5.38835	4.95918	8.47204	9.58484	7.48095	8.89309	4.79745	4.79745	4.73865	11.1692	4.12276	5.77092	5.31279	4.61205	6.86134	1
5.53864	11.5487	5.03609	10.1193	6.31401	4.71491	4.54755	5.77028	6.34589	5.35933	9.25122	9.93001	8.54273	4.54755	5.29391	4.35304	7.43063	5.74637	3.52569	8.14415	8.88457	7.4671	8.59634	4.71491	4.76603	4.9081	10.6255	4.35304	5.64639	5.35933	4.54755	6.40759	1
4.25455	11.0514	6.71789	12.2065	7.8247	5.58292	4.15471	4.43076	5.15241	7.12129	12.6789	11.8824	10.1236	4.7196	7.41747	4.58375	9.36222	4.95394	4.58375	9.37176	11.5498	6.91422	10.9823	4.78235	4.58375	5.24154	12.5616	4.15471	5.00643	5.32513	5.32513	10.0922	1
4.22922	10.4302	5.97954	11.6857	8.45044	5.8816	4.54586	4.7498	4.88356	7.19883	12.1232	11.1479	9.18082	4.60011	6.50983	4.22922	8.96415	4.48906	4.15355	9.11215	10.6145	6.66975	10.2856	4.36652	4.65204	5.04274	11.696	4.22922	4.88356	4.79597	4.65204	9.05786	1
4.19682	10.7543	5.06832	9.75095	6.54838	6.20974	4.04277	4.61191	5.10284	6.26964	10.074	9.98817	8.04576	4.61191	4.92044	4.66091	7.36957	4.95901	4.50756	7.75483	8.87063	6.48679	9.18208	4.66091	4.61191	5.37895	10.2684	4.04277	3.75343	5.5606	5.40642	7.57211	1
4.05756	11.684	4.67192	9.86224	6.13482	5.30659	4.05756	5.07813	4.91941	7.15065	8.65682	9.42478	7.66966	4.8619	5.30659	4.36194	6.90317	6.58707	3.78777	6.51804	8.84028	6.38856	7.701	4.8619	4.8619	3.61318	10.3558	4.16889	4.52695	5.88187	5.53794	6.71586	1
4.88259	11.8891	5.08195	10.2476	6.93318	6.481	4.5798	4.64652	4.31161	6.30125	10.2593	9.37826	7.64226	4.47226	5.65689	4.5798	7.45816	5.10487	4.17403	6.49779	9.46991	6.21229	7.90585	5.0107	4.77006	4.47226	10.384	3.82724	3.7544	5.51336	5.54657	7.69029	1
4.54874	11.8107	5.43163	10.6801	7.54754	6.38175	3.7566	4.31493	4.3982	6.74865	10.7527	9.86059	8.62954	3.89696	5.75027	4.47587	7.82532	5.10946	3.58727	7.75726	9.8751	6.28774	8.55137	5.39531	4.31493	4.61746	10.8538	3.89696	4.01864	5.53517	5.28013	8.494	1
4.94087	10.5111	4.18401	9.0078	5.96352	5.37225	3.62254	4.2857	4.62058	5.52715	8.88055	8.41327	7.25932	3.94513	4.54532	4.88293	6.80633	5.19744	4.2857	6.04163	7.80128	6.49326	7.71745	4.18401	4.37887	4.54532	9.53598	3.94513	3.62254	5.52715	5.28767	6.04163	1
4.38807	10.3114	4.86282	10.4185	6.2143	5.43732	4.07354	4.28042	4.51758	5.53906	10.4924	9.68047	7.69074	3.43139	5.13436	4.31746	7.01397	5.09606	4.76637	7.36693	8.7717	6.06865	8.36353	4.83939	4.38807	4.74107	10.0386	3.81273	4.24211	5.40681	4.90846	7.40128	1
5.07352	10.3853	5.79073	11.9642	7.53048	5.38314	4.05471	4.26636	4.73438	6.49424	12.1175	11.0789	8.96764	3.78548	6.15203	4.79749	8.32948	5.12238	4.73438	8.85094	10.3103	6.76997	9.21703	4.97003	4.79749	4.16581	11.1777	3.78548	4.91504	5.38314	5.1695	8.72775	1
4.10244	9.77427	4.28747	9.03214	6.23965	6.09752	3.87635	5.19999	5.70601	4.64976	8.01459	7.91008	5.98646	3.73845	4.28747	4.71077	6.27777	5.86589	3.5722	6.22019	7.45326	7.26813	7.72391	4.64976	5.15849	4.19894	9.38373	3.5722	4.446	5.76136	5.3173	5.39022	0
10.1632	10.578	4.73233	9.80372	5.47966	4.45012	4.07645	5.03082	5.65862	5.32827	8.80166	9.27928	7.8588	4.55166	5.52662	4.9268	7.5884	4.81371	4.27901	6.64375	9.02566	4.9268	7.975	5.15784	4.33895	4.50197	10.0802	4.21565	3.26986	5.69996	5.83571	7.03444	0
5.50611	12.3999	5.13448	10.0624	5.83081	4.69341	3.99433	6.01172	5.83081	6.03973	9.06428	9.76977	7.74043	4.76648	5.65986	5.02295	7.34438	5.58512	3.65867	7.62624	9.48261	6.72904	8.1557	5.50611	4.61579	4.44387	10.6045	4.69341	4.61579	6.19704	5.54618	7.36645	0
3.99133	12.023	5.37287	10.0964	6.30951	5.85657	3.99133	5.72485	5.41673	6.52098	10.1045	10.2052	8.61461	4.89629	5.65401	4.23864	7.31488	5.54047	4.52878	7.89284	9.58893	6.52098	8.80721	5.37287	4.43991	3.65646	10.5676	4.12234	5.57936	6.26316	5.23208	7.6462	1
4.20997	11.0168	5.45452	10.7364	7.46302	6.3935	4.52311	4.89878	5.25273	6.63281	11.6731	10.5351	9.27864	4.46691	5.82793	4.77073	8.59288	3.87068	4.72501	8.82777	9.72807	6.0887	9.53783	5.60657	4.72501	4.5768	10.7311	3.76273	4.40789	4.72501	4.27991	8.41303	1
5.10314	11.1894	5.92274	11.0423	7.78102	6.14757	4.26642	4.88097	5.10314	7.71839	11.6229	10.8641	10.0981	4.7083	6.42281	4.19703	8.7897	4.79757	5.60872	8.47644	10.3233	6.98221	10.1759	5.9779	4.61216	4.5078	11.4105	4.19703	5.20162	4.99676	4.452	9.31354	1
4.47519	11.0515	5.4267	10.0555	6.65051	5.6476	4.07967	5.0623	5.68121	6.47261	9.75032	10.3628	9.30848	3.62792	5.3013	4.07967	7.69594	5.16307	5.7461	8.51212	9.33979	6.58199	9.36538	4.70272	4.38859	4.38859	10.3019	3.95247	4.89501	5.21075	5.0623	7.86344	1
4.75498	11.6588	5.43522	10.46	6.43774	5.58663	3.63119	5.26495	5.65653	6.43774	10.5661	10.5728	9.58957	3.95693	5.48756	4.26741	7.77278	5.43522	6.18095	8.75582	9.60264	6.86341	9.28714	4.88229	4.33274	4.26741	10.6235	4.19798	5.56252	5.88642	5.26495	7.94702	1
5.11361	12.1785	6.40962	12.489	6.74356	4.35203	3.78119	6.16375	5.41262	7.85691	11.9041	11.7106	9.62816	5.62527	7.60251	4.43699	9.41664	5.59203	7.19888	9.91324	11.8332	7.69752	9.99957	4.43699	4.16003	3.92489	12.1364	5.11361	6.22933	6.09499	4.66045	9.07457	1
4.3238	12.099	4.3238	10.6749	5.62299	4.87091	4.10489	6.27509	5.91511	7.36462	8.79113	8.87153	7.80025	5.65864	5.15395	4.21987	7.53439	5.54881	3.97544	6.59858	8.9406	6.54326	7.44701	4.58878	5.42947	3.64478	10.0736	5.102	3.40413	6.50515	5.6934	6.31978	1
5.14119	10.8099	5.22612	9.52375	5.64744	5.38144	4.11863	4.11863	3.75045	6.10716	9.30622	9.31325	7.26493	3.58216	4.60668	4.38848	6.87833	5.73533	5.18433	5.89605	8.3442	6.50366	7.89092	4.53829	4.79167	4.84774	9.80202	3.35901	3.75045	5.67736	6.19172	6.15007	1
4.76065	10.71	6.18889	11.7833	8.464	6.00211	3.67968	4.8569	5.28755	5.66515	11.6629	11.4196	10.2404	4.11417	6.35388	4.02287	8.28087	4.98897	5.80981	8.69522	10.2246	6.74625	9.79428	5.28755	4.19806	4.34857	11.2627	3.92228	5.07013	4.65645	4.90243	8.65499	1
4.24684	11.4001	4.70995	10.1296	5.97462	5.27239	4.24684	4.14746	4.14746	6.84603	9.51717	9.56935	8.16442	3.37181	5.04604	4.24684	7.10621	5.92356	4.03768	7.46525	9.03458	6.54471	9.01966	5.04604	4.77245	4.77245	9.86318	3.91428	4.14746	6.09471	5.23008	7.35524	1
4.37521	12.6531	4.68726	10.4407	5.79722	6.52928	5.20787	5.145	6.62155	8.06154	9.92352	9.62682	7.95965	5.26793	5.79722	5.43361	6.92259	7.23086	3.94237	6.1799	9.68647	9.58753	9.05719	6.3786	4.77579	5.145	10.5816	4.93624	3.94237	6.35186	6.97589	7.44731	0
4.15761	12.1133	4.51323	9.38618	5.61011	6.07473	3.82983	5.14141	5.67474	6.96319	8.29985	8.75061	7.15355	4.65731	4.34931	5.67474	6.64118	6.02644	4.51323	6.36034	8.19209	6.44812	7.991	5.07767	4.7018	5.54232	9.83396	4.78631	3.46267	5.61011	5.01071	6.23888	1
4.18264	12.4674	5.14787	9.74923	4.99435	6.3954	4.54365	5.52487	6.06423	7.2885	9.90673	9.68668	8.55305	4.68971	4.75675	5.69674	7.2885	5.19533	5.04753	7.06027	8.70283	6.66384	8.33069	4.8204	4.54365	4.37733	9.41731	4.54365	4.61886	6.45329	5.28551	6.93092	1
4.32755	11.4983	4.40238	9.04724	5.91801	4.97062	3.5503	5.32935	5.79879	6.85389	8.50619	9.04466	7.43063	4.77318	4.24741	4.53898	7	5.82346	4.40238	6.67785	8.00944	5.6955	8.16015	4.82546	4.40238	5.01562	9.39793	4.47265	4.32755	5.87153	5.52457	6.46155	1
4.35885	12.3831	4.25288	9.50536	5.74859	5.60244	4.54536	5.56336	5.09516	5.97248	8.27574	8.86891	7.27371	5.56336	4.78021	5.78285	6.89564	6.28895	4.62871	5.97248	8.35069	7.23765	7.94453	4.78021	4.4558	4.4558	10.0683	4.70676	3.66533	6.79981	5.81629	6.50759	0
4.78205	11.4306	6.16343	11.7591	5.53283	3.70318	4.61569	5.23727	5.61871	7.63318	11.1625	11.4487	8.99783	4.52325	6.16343	5.12243	8.05129	7.15849	8.25538	8.69338	10.5214	8.23556	9.28165	4.19187	3.70318	4.61569	11.3197	4.78205	7.39162	5.61871	6.81004	8.42831	1
4.27592	13.2334	4.87993	10.1103	5.91995	5.23648	4.27592	6.44447	6.42238	6.20636	9.43011	10.1308	8.93645	5.91995	5.12796	6.39994	6.84352	6.46623	4.80974	7.31897	9.06954	7.99876	8.4748	6.12637	4.6565	4.15699	9.82468	5.0702	5.18332	6.86	6.28208	6.39994	0
2.80926	10.9731	4.09134	8.30033	5.88956	5.86008	3.81487	5.63424	6.357	4.71894	8.06577	8.79479	8.15826	4.85114	4.57111	4.3083	6.92083	4.09134	4.09134	6.58857	8.14627	5.32095	8.53456	4.78676	4.40264	5.52495	8.52533	4.85114	2.80926	5.86008	5.40624	6.55249	1
5.62946	10.9933	5.91675	11.3261	6.68071	5.26644	4.03424	5.72202	5.53026	6.61875	11.1384	11.3811	9.72537	4.88362	6.48613	3.76909	8.06665	5.42337	6.85194	8.34905	10.6192	6.5034	9.34225	4.99024	4.41791	5.30741	11.2956	4.03424	5.59718	4.99024	5.04046	8.73431	1
4.51227	10.9372	4.65628	9.3133	5.96648	5.68384	4.5864	5.15566	5.61973	5.3685	8.03019	8.86189	7.76524	3.92217	4.957	3.92217	6.44048	5.51762	4.04636	6.6128	8.46997	7.09122	8.12388	5.00954	4.25679	4.15681	9.9337	3.7788	3.60571	5.91434	5.55251	6.30611	1
4.48956	11.1974	4.68002	9.44573	6.57995	5.42077	3.97525	4.79241	4.4187	5.24232	9.26485	9.26485	8.35337	4.55642	4.94432	5.12269	6.92927	4.89565	4.68002	6.37544	8.74992	5.35218	8.15227	4.55642	4.68002	5.20362	9.54241	4.4187	3.55848	5.12269	5.48609	6.45761	1
8.24508	10.9427	4.64498	8.76429	6.06331	6.69253	5.09547	5.16951	5.30635	6.41243	8.70275	8.75277	7.23954	4.7975	4.7975	4.18898	6.86356	5.16951	4.47084	5.48876	8.17773	6.65573	7.15437	5.86089	4.97601	5.16951	8.98955	4.26636	3.91482	5.57161	5.74756	5.43063	0
4.64779	12.1995	4.5344	10.0732	6.17625	6.29352	4.47344	5.0601	5.27689	5.60189	9.44582	9.63397	8.15201	4.89293	5.72758	4.89293	7.2358	6.02912	4.01679	7.45883	9.54631	7.96923	9.83915	6.21075	4.59242	5.20845	10.5081	4.19121	4.47344	5.79788	5.57533	7.53513	0
4.27612	11.2796	5.58715	10.9879	7.13772	5.56	3.5236	5.69073	5.66555	5.4457	11.0071	10.448	10.1016	5.32098	5.78713	3.67984	7.7157	5.10927	5.25404	7.44469	9.94996	7.2832	8.46452	5.03052	4.60116	4.02309	10.9526	4.54292	4.54292	5.07048	5.07048	8.16713	1
5.07258	11.7285	4.22746	8.94971	5.86069	5.49264	3.94646	5.52243	5.63555	6.11374	8.70849	8.2679	6.2947	5.36656	4.51574	5.90616	6.93957	5.33313	3.94646	5.8374	8.09954	5.90616	7.79423	4.94311	4.7993	5.19049	9.36536	4.45013	4.04901	5.81371	5.11305	5.71471	0
3.77801	12.08	5.00798	10.7638	6.28381	4.78378	3.92128	5.32682	6.01482	5.55071	9.67367	10.3322	8.94847	4.95547	5.55071	4.34724	7.26386	5.40559	3.92128	7.87485	9.67753	6.8765	8.75383	5.28566	4.51098	4.25567	10.5447	4.65491	4.43198	5.71297	5.8304	7.13477	1
4.73579	10.9501	4.5051	8.91946	6.31695	5.46795	4.41724	4.10347	4.5051	5.42703	7.67457	8.20367	7.45387	3.64383	4.73579	4.58693	6.74978	5.09976	3.97414	5.91244	8.38121	5.42703	7.96676	5.46795	5.09976	5.38485	9.77105	3.82462	3.64383	5.46795	5.62045	6.12911	1
4.77926	11.7554	4.72086	9.63072	6.9458	5.77482	4.59516	5.21186	5.40268	6.59651	9.7168	9.38993	8.12337	4.83508	5.12726	4.59516	7.30278	4.83508	4.00276	6.90958	8.82193	5.90462	8.74548	4.65961	4.77926	4.59516	9.81602	4.52712	3.3551	5.36661	5.50554	7.03813	1
4.04103	10.4357	4.89407	9.4579	6.53498	5.47222	4.42649	5.05145	5.76459	5.79358	7.65513	9.26518	7.74557	4.83705	4.94866	4.64883	6.64919	5.67382	4.34199	6.25427	8.30707	5.93016	7.80286	5.00106	4.94866	4.71475	9.74018	4.64883	3.37341	5.47222	6.33471	6.37328	1
3.69127	11.2459	5.81725	11.0811	6.86155	4.90416	4.29439	4.29439	5.09597	5.58883	11.0177	10.8237	9.49851	4.59362	5.81725	4.90416	7.73989	5.315	3.43771	7.54464	9.95257	6.45573	8.60056	4.59362	4.59362	4.59362	10.7475	3.88154	4.67876	5.70772	6.18579	8.10838	1
4.82614	11.3892	6.53449	12.2843	7.44248	5.55209	3.89602	4.21033	4.49577	8.39264	13.0265	11.3818	10.8613	4.03378	7.91125	4.65358	9.27666	4.9781	4.26321	8.58174	12.1054	6.0241	10.1723	5.18963	4.49577	5.03424	12.3843	4.21033	4.15473	5.47506	5.21385	10.0076	1
4.89956	10.7365	5.35512	11.0154	7.00412	5.43548	3.94333	4.0293	3.74288	6.38078	10.5719	9.79028	8.09641	3.74288	6.08751	4.10841	7.11136	5.5833	4.25063	6.28488	10.1577	6.41998	8.66788	4.73381	5.38244	4.81938	10.6774	3.84875	4.18189	5.01123	5.32725	7.80906	1
4.5281	11.2275	5.48231	11.4334	7.5408	5.17813	4.35363	4.60658	5.02325	6.2769	11.4686	10.1353	9.4662	4.71561	6.42363	4.25532	7.66749	5.27222	4.68032	7.41688	10.4525	6.51055	9.30235	4.30555	4.87861	4.20269	11.3389	3.81295	4.20269	4.84764	4.96731	8.5876	1
3.90465	12.3394	5.25409	10.995	6.37398	4.87263	3.66564	4.82756	4.39262	6.18354	9.78051	9.89027	8.00631	4.78085	6.37398	4.95829	7.84532	6.72733	3.90465	7.62735	10.3138	8.10296	8.51781	4.09384	5.03866	4.91616	10.6122	3.90465	5.28686	5.7261	6.11392	7.5445	1
4.61854	11.4871	5.03643	10.4769	7.07236	5.41288	4.68006	4.79362	4.73829	5.85292	9.67933	10.239	8.49516	3.88529	4.02293	4.73829	7.31627	5.41288	4.40851	6.87174	8.57347	6.2568	9.00701	4.55323	4.99168	4.68006	9.39578	3.70383	4.23767	5.16162	6.30841	7.18593	1
4.97875	11.8059	4.78603	9.95839	6.58189	5.09182	4.46278	5.14467	4.78603	6.26204	8.88143	9.50307	7.48958	3.76276	3.96755	5.19537	6.98409	5.78438	4.46278	6.34908	8.26716	6.34908	8.45302	4.85388	4.97875	4.71385	9.2424	3.25988	4.36299	5.42235	6.16922	6.39065	1
5.24696	11.4818	4.50923	10.6504	6.39774	5.24696	4.44161	5.46803	5.5524	7.22244	10.1615	10.2805	9.02493	4.44161	3.863	4.20355	7.36355	5.13911	4.97893	7.42921	8.8178	6.5901	8.70776	5.84497	5.06164	3.863	9.49298	4.10684	4.36894	5.46803	5.70661	7.11111	1
5.76248	11.7454	4.60722	10.6148	6.54856	5.42858	4.54239	5.63334	5.76248	7.76877	9.74293	10.0187	8.24135	4.6683	3.87979	4.97783	6.90526	5.76248	5.10662	7.02016	8.64268	6.9161	8.4261	5.73762	4.72612	4.22926	9.31068	4.47318	4.83348	5.25983	5.7123	6.58991	1
3.90869	12.2647	5.26467	10.4885	6.85663	5.9066	4.66653	5.26467	5.09624	7.55542	9.36271	10.4535	7.99003	4.36586	4.17002	4.95289	7.00873	7.05244	5.26467	7.07381	8.96493	7.67177	8.04495	5.97766	5.09624	4.17002	9.90812	4.36586	5.09624	5.69676	5.51472	6.57032	1
4.35851	12.2987	5.73147	11.0505	7.14606	5.81089	4.6894	5.0157	4.94227	7.59648	10.5383	11.4509	9.08822	4.5905	4.35851	4.82281	7.91719	6.83028	4.82281	8.11238	10.0089	7.37308	8.50298	6.46039	4.82281	4.78007	10.1943	4.5905	4.6894	5.86755	5.73147	8.04225	1
4.7784	11.8408	6.4576	13.2716	10.4951	5.14354	3.87862	5.85364	5.70847	7.18539	12.6651	12.6883	10.7075	4.7784	4.60481	4.72353	9.20607	5.75861	6.90054	9.93766	11.5424	8.59127	10.8825	4.97487	4.31605	4.01485	11.5792	4.60481	6.61227	4.7784	5.45629	9.7924	1
4.50602	12.0437	5.1532	11.6127	8.39351	5.28456	4.28742	5.74296	5.6328	6.12499	11.1561	10.786	9.18537	5.35732	4.5538	4.5538	7.71018	5.82836	5.18059	8.09538	10.2242	7.16311	9.19943	4.8745	5.00635	4.50602	10.3832	5.18059	5.30927	5.1532	5.79484	8.3605	1
5.01228	11.4205	4.88007	10.5422	6.62439	5.65925	4.15759	4.88007	5.04318	6.50653	9.4724	9.87682	8.81735	4.40713	4.35098	4.84455	7.64378	5.88504	4.64811	7.06624	9.40199	7.05236	8.82347	5.47726	5.21384	4.64811	9.64224	4.40713	4.40713	5.15952	5.43318	7.18546	1
4.90907	11.3359	5.35757	10.4866	7.856	5.61379	3.99407	5.06743	5.15343	6.22817	9.47888	9.88012	8.8475	4.28755	4.22361	4.45602	7.34941	6.05689	5.00657	6.97909	9.40797	7.20138	8.69695	5.59424	4.97494	4.8747	9.64569	4.15441	3.99407	5.25959	5.18082	6.97909	1
4.4352	11.2786	4.60555	10.6162	8.09839	5.79623	4.10212	5.82586	5.9913	6.20733	9.74785	9.7422	8.18428	5.29307	3.75072	4.52395	7.07581	6.20733	4.4352	7.06372	8.92754	7.73063	8.29137	5.49542	4.81871	5.05248	9.6667	4.9982	5.56836	5.15433	5.82586	6.81223	1
4.20305	11.4418	5.24603	11.4538	8.52282	5.68104	4.57193	5.98436	5.82732	6.31311	10.9976	11.2326	8.59586	5.36909	4.40538	5.10974	7.64417	6.49593	4.49212	8.26854	10.0006	7.76187	9.19304	5.48146	4.71535	4.49212	10.125	4.95651	5.90809	5.48146	5.61778	7.77592	1
5.05724	12.6657	5.4036	12.2183	8.85738	4.8121	4.25008	5.05724	4.7562	6.99212	11.249	11.7363	9.63172	4.1489	5.33436	5.85622	8.49391	5.64894	5.64894	8.59197	10.6703	6.8339	9.29484	5.53195	5.26119	4.1489	11.1411	4.03276	4.8121	5.18355	5.05724	8.85152	1
4.90983	12.6642	5.32663	12.7253	8.80986	4.90983	4.90983	5.00528	4.75023	7.05422	11.8301	12.2328	10.3216	4.14515	5.39569	5.61219	8.92484	5.64042	6.16675	9.33764	11.1014	7.09426	9.89373	5.49285	4.85905	5.13567	11.5494	4.14515	5.46126	5.36162	5.00528	9.17296	1
4.67803	13.0787	6.04941	12.1609	9.16006	4.67803	4.28202	6.49167	6.12183	8.52408	11.0173	12.7202	10.1057	6.49167	5.26666	7.11691	8.15235	6.46431	5.33173	8.70259	11.5166	7.47069	10.1188	6.34922	5.19809	4.28202	11.0289	6.31892	6.59609	5.66589	4.87799	8.75935	1
3.87092	12.7292	5.37009	10.9097	7.56683	5.16106	4.11779	6.56886	5.97845	7.44179	9.74482	11.3378	9.17711	6.45747	4.70645	6.62143	7.5126	5.65763	5.16106	7.98021	10.1489	6.42819	9.23255	6.13289	5.16106	5.37009	10.1796	6.13289	5.49271	5.93698	5.43284	7.44179	1
4.25168	11.6859	5.17487	12.121	8.49689	5.89027	4.63736	5.7673	5.43526	6.68672	11.2538	11.2442	9.94977	4.80665	4.37852	5.87336	7.59161	6.10738	4.49018	8.91808	10.0309	7.07508	9.76023	5.31166	4.95396	4.43595	10.4125	4.63736	4.63736	5.4816	5.38723	8.74109	1
4.04162	11.6399	4.93386	10.8451	7.23033	5.90437	4.15901	5.6719	5.35519	6.20223	9.96287	10.0673	9.31015	4.98311	4.04162	5.55415	7.24875	5.78016	4.26126	7.55264	8.91578	6.5852	8.63455	5.24297	5.28148	4.77233	9.44951	4.65022	3.90072	5.72711	5.99622	7.47665	1
5.03942	12.7755	6.04557	12.0264	7.58111	4.40455	4.15553	5.09886	4.84114	8.17102	11.523	12.8549	11.3107	4.68715	5.53624	7.1858	8.69387	6.39475	5.40625	9.55254	11.8544	7.51231	9.6987	4.68715	4.76678	4.15553	11.6534	4.76678	5.69183	5.69183	5.35988	9.0767	1
7.56381	12.9491	5.12688	11.8301	7.46413	4.16275	5.16941	4.94034	4.98973	9.02483	10.6381	12.0619	9.60848	4.51748	4.98973	6.70757	8.53762	7.09483	7.58586	8.18062	10.259	9.98331	8.94196	4.98973	5.03718	4.16275	10.9041	4.2654	7.53387	5.56234	6.13284	7.16502	1
5.84925	11.8763	6.02137	12.7114	8.80255	5.05871	4.39439	5.05871	4.60215	6.37639	12.1708	11.9641	10.2545	4.12666	4.60215	4.46855	8.69807	5.95932	4.72066	9.55823	10.9301	6.60723	9.37293	5.17876	4.82768	4.12666	11.2794	4.22549	4.97161	4.72066	4.66303	9.24531	1
5.85569	11.8774	6.0736	12.8617	8.83566	4.83944	4.45145	5.17854	4.62386	6.67791	12.3322	12.4267	10.8364	4.45145	5.02084	4.11407	8.90669	5.8849	4.24163	9.92327	10.8758	6.36776	9.78121	5.07568	5.02084	4.45145	11.4683	4.11407	5.36204	4.70048	5.4041	9.42021	1
4.7831	12.3164	5.33258	11.2503	7.99223	6.46542	5.12635	6.43752	6.35032	6.46542	10.3776	10.3334	9.03827	5.7152	4.7831	4.43297	7.58965	6.91194	4.7831	8.53194	9.55704	7.34369	8.66875	5.85072	4.67866	4.56311	10.1049	5.2675	4.67866	5.66683	5.66683	7.75551	1
4.75451	12.2853	4.95127	11.244	8.16519	6.34378	4.75451	6.21122	6.11033	6.22506	10.5801	10.3347	9.03872	5.79228	4.46014	4.75451	7.65794	6.91781	4.71073	8.17925	9.75326	7.25424	8.50085	5.79228	5.02159	4.19992	10.0646	5.40136	4.27239	5.75407	5.40136	7.91502	1
5.015	12.5166	6.89818	13.8572	7.34626	4.93401	4.0829	5.09091	4.75303	7.74216	14.0812	13.5603	11.8448	4.40903	6.27095	6.73299	9.60086	5.80612	6.97411	11.2097	11.9984	7.495	11.7393	4.0829	4.26136	3.84573	12.3636	4.0829	5.46961	5.015	4.53681	10.7209	1
4.56101	12.7153	7.21685	14.0407	7.237	4.88758	4.19497	4.99588	4.70342	7.87289	14.0035	13.4801	11.6849	4.4818	6.55815	6.49217	9.47532	5.78117	5.8632	10.7571	12.4425	7.49282	11.3394	4.70342	4.07313	4.301	12.5366	4.19497	5.18717	5.18717	4.4818	11.0536	1
4.33286	11.3389	5.25758	10.2979	7.59561	5.28518	4.78787	5.36458	4.94177	5.48698	9.14489	11.128	8.93193	4.56005	4.45305	5.17099	7.06903	5.48698	4.56005	6.52918	8.95026	7.35944	8.83883	5.43939	5.20052	4.94177	9.10001	3.80556	4.70237	5.5553	8.86053	6.76095	0
4.03901	11.4436	4.80167	9.65087	6.17539	5.24487	4.61973	5.29057	5.17308	5.74171	8.42889	10.1591	8.20067	4.53737	4.03901	5.01573	6.72628	5.83416	4.61973	6.10378	8.49223	7.35254	8.07139	5.55376	5.22139	4.49358	8.82118	4.34912	4.86693	5.70943	6.04116	5.93465	0
4.25781	11.7883	5.75545	12.4148	7.27869	5.66482	4.84173	5.22372	5.15626	5.56762	11.8063	11.8763	9.99061	4.64558	4.74796	5.00922	8.07671	5.79859	3.8436	9.06506	10.5666	7.39264	9.62283	5.51622	4.92844	4.74796	11.3482	4.25781	4.84173	5.6171	5.08494	8.71808	0
4.58266	11.8419	5.61286	11.1896	6.84247	5.99461	4.93272	5.07473	4.77129	5.37162	10.6377	10.6686	9.04921	4.3519	4.3519	5.00582	7.51319	6.1218	4.04104	7.65416	9.72023	6.68873	8.72045	5.96089	5.00582	4.58266	10.3455	4.21101	4.474	5.52159	5.07473	7.30509	0
3.89668	12.0091	4.50484	9.99781	6.58449	5.37888	4.64193	5.15153	5.06561	5.23192	8.68496	9.59962	7.64953	4.50484	3.89668	4.50484	6.58449	5.51086	4.97319	6.58449	8.33249	6.91675	7.87649	6.22563	4.50484	4.97319	9.36243	4.34598	4.64193	5.44653	6.22563	6.49533	0
4.51757	12.1132	4.39152	10.7599	7.12351	5.13563	4.07005	5.13563	4.98985	5.89432	9.6697	10.3268	8.8038	4.62962	4.51757	4.07005	7.13954	6.00552	4.90979	7.51579	8.97366	7.24697	8.51658	6.26462	5.26607	4.24592	9.8059	4.24592	3.83647	5.26607	6.17302	7.38767	0
7.00782	10.8624	4.40387	9.62136	7.06048	6.09978	6.50974	4.96793	5.11941	7.46984	8.63685	8.34447	7.51446	4.46956	3.97169	5.66277	6.82693	5.00761	5.43326	5.91819	8.09503	5.81753	7.68022	5.95648	7.02559	5.89865	9.24872	4.33331	4.92689	6.40431	6.14992	5.5402	0
7.1208	10.963	4.7083	10.4196	7.96987	6.09135	5.97319	5.39806	5.39806	7.53541	10.8795	10.2902	9.74755	4.19827	4.07603	5.50697	7.24628	4.83467	5.84392	7.68302	8.97369	6.15769	8.37787	5.35964	6.71956	5.54136	10.1115	4.30465	5.05238	6.06851	6.26169	7.21593	0
4.72767	11.7358	4.95039	11.087	8.99409	6.59632	4.66438	4.66438	4.59716	6.68236	10.1957	11.0319	8.90231	4.27183	4.27183	4.8444	7.58849	4.8444	4.52534	8.08821	9.32091	6.73695	8.48634	5.60565	5.1378	5.09357	10.0853	4.27183	4.16857	6.04169	6.24562	7.87514	0
4.87505	11.7545	4.77963	10.0062	7.19652	6.487	4.56007	4.72874	4.49725	6.79044	8.57007	9.69615	7.33731	4.6754	4.28005	4.49725	7.22097	5.2294	4.35818	6.77947	8.40268	6.89571	7.68608	5.82395	5.41989	5.35947	9.42985	4.49725	3.68357	6.31437	6.25176	6.45965	0
5.17949	11.7347	4.69154	11.7347	7.85768	6.65773	4.44388	4.89308	4.57508	6.47419	10.6593	10.713	9.46945	4.1085	4.37108	4.84593	7.65243	5.25045	4.29211	8.09246	9.68808	6.92584	9.12395	6.27928	5.02417	5.10427	10.4017	3.86421	4.69154	5.63567	5.82702	8.62256	0
5.007	12.0358	5.10084	12.3562	7.66516	6.49928	4.53069	4.53069	4.36885	6.88806	11.2541	11.3481	10.0914	4.36885	5.22947	4.95721	8.07925	6.07318	4.53069	8.51823	10.7665	6.72068	9.47276	6.05134	5.18804	4.27619	11.1434	4.17252	4.45311	6.02916	5.88796	9.42781	0
11.1245	12.6402	6.55582	7.36706	7.27091	6.45993	8.87983	5.92108	5.83329	7.54804	9.15593	9.09178	6.37912	6.13911	6.64166	6.18015	9.25596	6.48503	7.44653	6.28761	9.301	7.36706	8.82922	7.79687	6.90652	6.89093	10.866	6.09436	7.64196	6.59982	6.62099	6.37912	1
11.1577	12.7043	6.63623	7.28243	7.07271	6.55081	8.89501	6.0424	5.94782	7.629	9.18484	9.33898	6.43483	6.0424	6.53263	6.47545	9.30441	6.18489	7.42214	6.45541	9.21621	7.44521	9.07956	7.94292	7.14372	6.79949	10.9645	6.11896	7.68057	6.58602	6.53263	6.29689	1
11.0706	12.7289	6.46203	7.22997	7.29361	6.57398	9.0139	5.91289	5.91289	7.40213	9.11832	9.31125	6.38606	6.16503	6.77827	6.48573	9.37459	6.61479	7.27278	6.41228	9.43524	7.37349	8.86044	7.7318	7.06614	6.53106	10.8704	6.16503	7.61801	6.74437	6.53106	6.33044	1
9.4435	10.3006	6.41638	6.56138	7.88985	6.77818	8.01047	6.48187	6.29164	7.48195	9.05959	8.80391	6.36919	7.02687	6.66799	6.34434	9.35828	6.09725	6.26356	6.46067	9.18217	6.79292	7.6444	7.3663	6.71683	6.70084	10.2714	6.9546	7.34884	6.59841	6.26356	6.17015	1
9.50587	10.2467	6.55055	6.29781	7.58161	7.02725	8.11547	6.23974	6.32493	7.36329	9.0844	8.81358	6.26947	7.19224	6.66034	6.20842	9.37339	6.35097	6.32493	6.4683	9.22509	6.80331	7.77406	7.3544	6.48968	6.53077	10.3109	6.92788	7.37211	6.7266	6.20842	6.01401	1
9.55417	10.3203	6.47658	6.47658	7.57435	6.69053	8.31474	6.47658	6.13395	7.35135	9.16104	8.70286	6.1746	7.08986	6.6318	6.31266	9.40964	6.31266	6.45172	6.56882	9.3315	6.7457	7.75637	7.34112	6.45172	6.39936	10.221	7.01041	7.2336	6.70929	6.59033	6.31266	1
11.4362	12.6732	6.74184	8.68646	6.70674	7.0755	8.95308	6.55068	6.41046	9.15693	10.625	9.65078	6.4357	6.98479	7.12416	6.91493	10.2299	6.67025	7.24809	6.20077	10.1539	7.65294	8.94118	7.38894	7.96557	7.91626	11.7309	6.77568	7.4446	6.68868	6.6322	7.27971	0
11.4142	12.6343	6.64885	8.92002	6.35524	7.03413	8.70887	6.64885	6.43363	9.13772	10.5873	9.64049	6.45798	7.09654	7.05952	6.78927	10.346	6.64885	7.00813	6.19928	10.2386	7.75151	8.97911	7.38483	7.82046	7.68616	11.7129	6.86757	7.36573	6.54833	6.70404	7.24425	0
11.3679	12.5935	6.68864	8.90784	6.50666	7.21554	8.78987	6.59238	6.32878	9.13094	10.6685	9.69888	6.46007	6.87059	6.92924	6.82426	10.3008	6.7067	7.0503	5.9774	10.2237	7.81849	9.01104	7.22647	8.05897	7.77028	11.711	7.0375	7.29001	6.87059	6.65139	7.14766	0
12.0008	12.5376	6.68336	6.60463	7.04157	6.88598	9.46182	6.62498	6.42051	7.83583	10.0611	9.84557	7.01493	7.34048	7.02833	6.5624	9.64329	6.49468	8.07919	6.27647	9.99084	7.61222	8.86272	6.88598	7.45644	6.66432	11.3084	7.04157	6.5624	7.01493	6.54045	6.17076	0
11.98	12.5421	6.76089	6.57979	7.01983	6.95419	9.5495	6.57979	6.51713	7.73171	9.94185	9.84645	6.92675	7.50953	7.11724	6.40007	9.63775	6.6749	7.77324	6.15653	9.92005	7.6668	8.77189	6.83972	7.80687	6.61909	11.2454	7.16292	6.69275	6.92675	6.59967	6.4491	0
11.9941	12.4568	6.79738	6.53311	7.05656	6.96327	9.48906	6.61702	6.23829	7.736	10.0211	9.90464	6.8609	7.44305	7.00424	6.3878	9.53151	6.51072	7.84743	6.30234	9.91687	7.58985	8.98479	6.82965	7.52291	6.764	11.2683	7.20014	7.00424	6.79738	6.65607	6.5549	0
9.33855	12.8384	6.41448	6.82427	8.1228	6.31025	9.53046	5.8215	5.90445	8.04406	9.2227	8.86868	6.02133	5.96794	6.77827	6.54726	9.10669	6.54726	7.03954	6.38986	9.52859	7.43642	8.21163	7.26978	6.76244	7.2598	11.4119	5.96794	7.62839	6.46134	6.38986	6.11059	1
9.18454	12.8643	6.66471	6.84596	8.01759	6.21994	9.57071	5.62071	5.8339	7.99249	9.16287	9.00726	6.04594	5.8339	6.70387	6.5118	9.02241	6.28949	7.44148	6.38124	9.42853	7.49842	8.20317	7.27518	6.94053	7.1075	11.4773	5.8339	7.67145	6.35204	6.28949	6.40927	1
9.31988	12.806	6.48524	6.7593	7.93613	6.28927	9.52923	5.62071	5.88492	7.9412	9.14198	8.96052	6.14696	5.80767	6.74531	6.50409	9.05415	6.28927	7.16601	6.31404	9.42315	7.37259	8.35612	7.23899	6.81329	7.1374	11.4474	6.07708	7.6665	6.31404	6.20827	6.23653	1
10.0515	10.4519	6.69067	6.51536	7.37384	6.49338	8.03377	6.25831	6.34595	6.83738	7.48931	9.42172	5.82381	7.21461	6.69067	6.69067	9.09856	6.49338	6.89611	6.39852	9.62721	6.91028	7.76271	6.79093	6.59775	6.49338	10.8853	6.85239	7.80311	6.47077	6.19191	5.82381	1
10.1673	10.4032	6.66451	6.33554	7.35003	6.26848	7.99315	6.33554	6.33554	7.10884	7.74764	9.42112	5.83825	7.32802	6.9026	6.57688	9.05249	6.50459	6.8862	6.39641	9.6034	6.79994	7.77124	6.86953	7.02524	6.74428	11.0161	6.9026	7.86887	6.50459	6.05456	5.62071	1
10.0574	10.3532	6.52939	6.31682	7.32973	6.21591	7.9145	6.37617	5.9868	6.61716	7.61848	9.34664	5.91989	7.11092	6.82149	6.6968	9.05339	6.34715	6.87038	6.40402	9.49698	6.63775	7.73752	6.87038	6.82149	6.55222	11.0549	6.90171	7.79679	6.37617	6.09249	5.9868	1
9.93502	12.7513	6.54826	8.09519	7.07385	6.61622	8.94017	6.39202	6.18977	7.53163	9.74075	9.02625	6.05206	7.1531	6.89561	6.79346	9.66572	6.39202	8.00785	6.39202	10.0131	7.54089	8.20536	7.00317	6.73807	7.42493	11.5736	6.61622	7.5862	6.42042	6.47413	6.05206	0
9.94524	12.6831	6.59558	8.10449	6.90108	6.75171	8.86265	6.48125	6.09225	7.69813	9.73981	8.9958	6.04284	7.01765	6.91639	6.85375	9.28495	6.48125	7.9907	6.28467	10.0106	7.42963	8.33631	6.8209	6.55175	7.03136	11.4453	6.52893	7.40029	6.63725	6.25114	5.91973	0
9.79416	12.6272	6.71292	8.26741	7.08171	6.61465	8.57134	6.40201	6.24983	7.74034	9.61466	9.15074	6.04196	7.09459	6.8673	6.74944	9.46027	6.34529	7.66281	6.13573	10.0747	7.38703	8.33667	6.91383	6.57202	7.29384	11.5548	6.6749	7.28302	6.57202	6.31504	6.04196	0
9.51921	12.9058	6.80622	6.47044	7.75757	7.11733	9.67016	6.56206	6.27623	7.77202	9.99866	9.7348	6.3376	7.49216	6.88553	6.56206	8.87476	6.47044	7.53613	6.17056	9.96316	7.42787	8.28938	6.97321	7.28811	7.12954	11.2182	7.14162	6.78957	6.8226	6.49436	6.44575	0
9.57406	12.9805	6.79877	6.48627	7.78562	7.10174	9.60155	6.29511	6.23727	7.73441	9.98053	9.7128	6.20607	7.56728	6.85585	6.42046	8.9296	6.48627	7.41722	6.13772	9.91095	7.3302	8.23429	6.84188	7.14488	7.16585	11.2611	7.24608	7.01007	6.86962	6.56616	6.44304	0
9.56445	12.9316	6.78743	6.4442	7.7613	7.21998	9.67437	6.69962	6.49273	7.73947	9.87651	9.83634	6.2069	7.77565	6.73573	6.36484	8.91758	6.36484	7.47098	6.46885	9.82653	7.52423	8.29989	6.82041	7.17437	7.06451	11.259	7.03854	6.68101	6.88324	6.80406	6.58164	0
