# Supplementary material
Source: Research Square preprint supplement (doi:10.21203/rs.3.rs-8614090/v1)
Supplement: Supplementary file 4 [file 94caa006a4eb06c293c49f44.xlsx]

## Sheet: Overall all results
	Supplementary File-4:
Model	Accuracy	MCC	Precision	Recall	AUC	F1
gbc	0.908	0.68	0.912	0.896	0.914	0.879
gbc_hpt	0.9171	0.7197	0.9243	0.9171	0.9385	0.9107
lightgbm	0.916	0.66	0.912	0.9	0.902	0.89
lightgbm_hpt	0.905	0.7077	0.9166	0.9163	0.9513	0.9099
et	0.891	0.6	0.892	0.88	0.953	0.862
et_hpt	0.9046	0.6431	0.9076	0.9046	0.9302	0.8897
rf	0.887	0.58	0.89	0.88	0.84	0.866
rf_hpt	0.9042	0.644	0.9017	0.9042	0.9581	0.8926
ada	0.9038	0.54	0.9	0.873	0.86	0.855
ada_hpt	0.883	0.6055	0.8971	0.9038	0.8128	0.8858
xgboost	0.892	0.63	0.891	0.888	0.915	0.873
xgboost_hpt	0.9038	0.6741	0.9068	0.9038	0.9385	0.8984
knn	0.866	0.48	0.835	0.877	0.805	0.835
knn_hpt	0.8721	0.506	0.8585	0.8721	0.8284	0.8591
lda	0.868	0.5	0.874	0.862	0.883	0.847
lda_hpt	0.8721	0.5203	0.874	0.8721	0.894	0.8583
nb	0.865	0.5	0.855	0.859	0.842	0.844
nb_hpt	0.8654	0.5015	0.8636	0.8654	0.8425	0.854
lr	0.852	0.45	0.85	0.846	0.892	0.887
lr_hpt	0.8596	0.4719	0.8588	0.8596	0.9004	0.8448
dt	0.842	0.52	0.81	0.825	0.811	0.85
dt_hpt	0.8583	0.5206	0.8532	0.8583	0.7737	0.85
ridge	0.848	0.40	0.832	0.8533	0.843	0.843
ridge_hpt	0.8533	0.4167	0.8408	0.8533	0.894	0.8295
qda	0.838	0.43	0.85	0.833	0.800	0.834
qda_hpt	0.8529	0.4592	0.8565	0.8529	0.8248	0.8381
dummy	0.8142	0	0.6632	0.8142	0.5	0.7309
dummy_hpt	0.8142	0	0.6632	0.8142	0.5	0.7309
svm	0.782	0.254	0.735	0.745	0.744	0.805
svm_hpt	0.775	0.2197	0.7559	0.7829	0.7645	0.7427
